# Supplementary material for: CD49a Identifies Polyfunctional Memory CD8 T Cell Subsets that Persist in the Lungs After Influenza Infection
Source: Front Immunol. 2021 Sep 9;12:728669. doi: 10.3389/fimmu.2021.728669 (PMC8462271; doi:10.3389/fimmu.2021.728669)
Supplement: Supplementary file 5 [file Table_5.xlsx]

## Sheet: ihw.res.DPvsDN.all.stim.4-14-21
Gene	pvalue	adj_pvalue	basemean	log2FoldChange
Card10	1.14275e-17	1.37665e-17	85.6346	8.68319
Ccl1	6.65932e-157	1.26456e-156	37106.1	7.34338
Itgae	3.0094e-81	3.0094e-81	1211.46	7.33208
Tmem171	3.69873e-12	2.27653e-12	44.6106	7.11076
Ifitm1	5.90383e-74	5.90383e-74	1210.21	6.63373
Plekhf1	1.59486e-09	1.85574e-09	19.8844	6.47656
Rgs8	1.53811e-09	1.53811e-09	22.4529	6.45279
Scn1b	3.96553e-46	3.19813e-46	145.544	6.40125
Ppp2r2c	9.79121e-54	7.99288e-54	196.256	6.2472
Chn2	6.37961e-14	4.55078e-14	40.1089	6.16264
Csf1	1.29782e-187	2.47608e-187	2939.11	6.13634
Adgrg1	2.69633e-82	2.24551e-82	410.719	6.08147
Prph	1.33999e-10	1.03461e-10	30.1224	6.0596
B4galnt4	2.43847e-20	2.43847e-20	180.537	6.01113
Syn1	1.37648e-08	8.47206e-09	23.7471	5.93224
Wnt11	9.19283e-09	5.81335e-09	23.4163	5.9036
RP23-136I22.1	2.77335e-08	3.8237e-08	12.4362	5.81391
Sema6a	1.76659e-07	1.76659e-07	10.3847	5.6544
Adam8	4.11312e-196	7.6826e-196	3920.97	5.53318
Lgals3	9.01773e-202	1.72046e-201	5196.72	5.52236
Dhrs9	5.78998e-10	5.78998e-10	26.3856	5.39592
Adgrf5	2.48446e-06	1.57112e-06	45.6466	5.38989
Itga1	1.75031e-38	1.75031e-38	583.781	5.38855
Btnl9	8.2634e-07	1.1393e-06	10.4336	5.16864
Tjp1	2.67796e-07	2.15973e-07	194.086	5.16273
Mt1	2.23978e-28	3.55453e-28	2022.52	5.15883
Cass4	4.85248e-20	4.13599e-20	83.2361	5.1384
Fgl2	2.48978e-216	3.92466e-216	1559.56	5.0764
Mt2	5.09674e-30	4.11043e-30	143.135	5.05188
RP24-399B3.6	9.84111e-09	9.84111e-09	18.8236	5.03101
Dixdc1	2.07883e-06	2.41887e-06	10.7519	5.02181
Hpgd	2.30452e-07	1.4184e-07	22.8601	5.00217
Cd70	3.90303e-20	3.32673e-20	78.5402	4.94385
Gcnt1	2.18266e-53	1.6929e-53	254.207	4.94279
Csf2	6.40214e-197	1.01752e-196	2769.3	4.88956
Zfp683	9.8252e-13	9.8252e-13	31.3802	4.87836
Tnfrsf11a	1.33292e-06	8.20399e-07	21.0494	4.87411
Gpr34	6.63443e-19	4.08342e-19	46.5569	4.85131
Ptgir	1.7821e-06	1.7821e-06	12.1047	4.84019
Emp1	8.50837e-93	8.50837e-93	1086.66	4.81842
Lyve1	5.51069e-06	6.4121e-06	10.3778	4.767
Zfand4	2.85093e-06	3.31727e-06	14.1135	4.74654
Sema6d	2.02444e-35	1.57018e-35	243.575	4.66985
Lims2	9.05487e-06	1.24842e-05	10.3306	4.59033
Dkkl1	1.26468e-15	7.9976e-16	36.3846	4.58083
Trpm6	3.22005e-47	2.49751e-47	255.319	4.56797
Sv2c	1.45843e-55	1.02329e-55	382.495	4.56737
Tgfbr3	1.73441e-12	1.39877e-12	165.781	4.52432
Hip1	6.64163e-67	6.60126e-67	690.637	4.48431
Capg	5.0362e-211	5.0362e-211	3242.88	4.42787
Eya2	9.04216e-10	5.56535e-10	21.9955	4.38906
Il2	1.23871e-126	2.35223e-126	5368.96	4.33003
Havcr2	1.20811e-58	1.20811e-58	6699.69	4.31409
Hlx	5.36337e-11	4.14107e-11	33.99	4.31166
Car5b	2.0999e-19	2.52971e-19	102.653	4.30842
Wnt3	5.22775e-06	6.15616e-06	12.0673	4.27015
RP23-137N6.2	1.28145e-05	1.50902e-05	10.0271	4.25935
Lingo1	1.64084e-11	1.26689e-11	49.0564	4.24648
Scn7a	4.6154e-07	2.84073e-07	24.7677	4.22399
Il10	1.33534e-50	9.3692e-51	460.087	4.2164
Thbd	9.80529e-06	1.35188e-05	17.278	4.17201
Fam129b	1.31246e-68	1.24158e-68	727.279	4.16162
Ms4a7	1.37932e-05	1.9017e-05	11.3456	4.15882
Crmp1	5.45777e-21	4.21396e-21	104.341	4.15395
Cd101	3.56154e-43	3.56154e-43	271.396	4.14969
Plekhg3	4.36846e-12	3.3729e-12	42.6115	4.14294
Slc35e4	6.99582e-28	5.40149e-28	81.1475	4.12422
Aplp1	1.87553e-17	2.2594e-17	91.7515	4.10331
Lamc1	2.45849e-33	3.8292e-33	1703.5	4.10303
Itgax	2.95629e-156	4.69163e-156	2226	4.0948
RP23-476G10.1	1.26287e-05	1.74115e-05	13.9182	4.07199
AC162528.2	2.08551e-11	1.48766e-11	38.3843	4.06789
Arnt2	3.19655e-05	3.71942e-05	10.5323	4.06777
RP23-340G24.4	4.04994e-07	4.04994e-07	16.6118	4.0257
Ttc39c	9.82424e-179	1.53016e-178	1577.44	4.02269
Ptpn5	2.6248e-27	2.14271e-27	248.686	3.99885
Dusp14	1.03214e-29	7.98915e-30	116.209	3.98039
Lmna	3.0222e-69	3.00383e-69	1219.54	3.93794
Irak3	2.74212e-20	2.74212e-20	67.5546	3.9299
Chit1	2.4614e-05	2.89852e-05	10.7746	3.92619
RP23-49E21.2	7.51994e-07	4.62844e-07	22.123	3.87581
Efr3b	8.00895e-06	6.66987e-06	141.385	3.85677
Mlf1	8.42669e-11	5.18653e-11	24.8011	3.84393
Fam20a	6.10897e-16	5.20696e-16	73.6118	3.80558
Wnt10b	5.91668e-27	7.12768e-27	127.264	3.7986
Galnt3	4.08639e-115	4.08639e-115	645.805	3.79243
Adrb1	8.68459e-34	7.40228e-34	108.528	3.78206
Vim	4.20188e-114	6.62345e-114	2472.6	3.77865
Myadm	4.13778e-36	3.44595e-36	317.758	3.77178
Mst1r	1.20043e-06	1.12852e-06	15.6206	3.76581
Aqp1	1.04406e-05	1.04406e-05	26.0769	3.76471
Spns2	3.63028e-14	2.23439e-14	48.9753	3.75868
Mmp13	8.41026e-07	6.86557e-07	163.68	3.74627
RP23-449F12.9	3.46437e-21	3.46437e-21	65.4026	3.72274
Camk2n1	1.36693e-26	1.05541e-26	93.0793	3.71955
Cdh1	9.96838e-34	6.99417e-34	442.162	3.71499
Cdk14	2.66607e-08	1.68597e-08	38.4073	3.70018
Cfap54	7.8992e-06	1.08909e-05	16.689	3.67852
Neu4	6.11531e-06	7.11562e-06	11.9651	3.67623
Hfm1	1.11778e-06	1.31628e-06	14.1263	3.66565
Popdc2	6.50888e-20	5.02552e-20	75.7036	3.62141
Sphk1	1.45755e-16	1.45755e-16	105.006	3.57907
Agap1	8.52889e-08	6.58517e-08	39.3797	3.56846
Acot11	2.3729e-09	2.3729e-09	38.0103	3.55074
Cdkl2	3.11426e-13	1.91679e-13	48.3645	3.55071
Dennd3	9.46257e-37	9.46257e-37	482.521	3.53879
Trpv2	2.43027e-77	2.29902e-77	1134.93	3.5378
Epn2	3.12983e-16	2.6677e-16	65.3061	3.51813
Padi2	6.57119e-56	6.57119e-56	383.909	3.51805
Epha2	1.14748e-19	1.14748e-19	143.601	3.50783
Pxdc1	6.86293e-08	4.22405e-08	38.5609	3.49008
Pla1a	5.26526e-09	5.26526e-09	26.3656	3.4842
Gm26780	8.67923e-11	6.19117e-11	29.9413	3.47255
Plec	5.80236e-53	9.14629e-53	1499.52	3.45705
Gldc	2.67233e-35	2.15519e-35	194.714	3.45091
Cd177	8.32488e-05	7.8262e-05	15.2056	3.42522
Rgs16	8.85111e-284	8.85111e-284	27786.4	3.4129
RP23-184B11.4	1.91945e-18	2.31232e-18	67.1256	3.41216
Ece1	2.12741e-105	3.3762e-105	2671.4	3.40893
Dubr	1.09353e-16	8.44319e-17	56.1244	3.40594
Mafb	3.23464e-05	3.80909e-05	17.1755	3.38043
Tns3	2.86395e-06	2.04294e-06	23.1988	3.3771
Ifitm2	1.85187e-13	1.57843e-13	104.658	3.37424
Slc4a11	2.24256e-09	2.24256e-09	44.1366	3.35911
Il1rl1	1.68126e-10	1.40016e-10	211.661	3.35499
Foxp3	1.02632e-10	1.02632e-10	76.3772	3.32927
Cbr3	1.3052e-27	1.11248e-27	126.883	3.32691
Ptprj	3.95237e-67	3.92835e-67	798.092	3.32441
AC117550.1	5.91401e-11	4.56622e-11	62.9529	3.31878
Gpr55	8.79245e-21	7.49421e-21	84.28	3.31738
Nrp1	2.1322e-148	2.1322e-148	1833.63	3.31561
Ahnak	1.52429e-76	2.40275e-76	1716.14	3.3122
Zfp862-ps	8.68125e-43	7.08679e-43	335.983	3.3102
Arc	1.18083e-23	9.83396e-24	184.942	3.30831
Cd93	1.79622e-06	1.38687e-06	30.1911	3.30739
Sytl2	6.6165e-15	5.51023e-15	459.409	3.29949
Acvrl1	3.42158e-07	4.12189e-07	49.4825	3.27067
AC113001.2	6.10671e-05	7.10561e-05	12.2681	3.27028
Ctnna1	1.05847e-69	1.05204e-69	1253.81	3.26532
RP23-146O20.1	6.04553e-07	4.31247e-07	43.6083	3.25545
Adora2b	4.37188e-27	3.52584e-27	287.873	3.24535
Ifitm10	2.11893e-14	2.11893e-14	54.284	3.24149
Plvap	8.85555e-07	5.45049e-07	36.2234	3.23724
Rasd1	2.49726e-05	2.94076e-05	16.0785	3.20304
Foxd2os	1.26219e-06	9.00362e-07	21.0433	3.20286
Evpl	2.73666e-09	1.95214e-09	37.056	3.19855
Gpr160	1.81214e-19	1.39916e-19	73.6729	3.19617
Cd80	1.12846e-40	7.91766e-41	379.409	3.18696
Slco4a1	4.27205e-22	4.04134e-22	1187.97	3.17786
S100a6	4.29438e-46	6.81517e-46	1450.08	3.1597
Col3a1	0.000111744	0.000111744	19.4407	3.15502
Osbpl3	8.34794e-173	8.34794e-173	3012.17	3.13918
Atp8a2	9.55165e-07	7.37485e-07	22.1915	3.13799
Entpd1	9.00067e-29	9.00067e-29	465.994	3.13753
RP23-115A1.9	1.64242e-10	1.17159e-10	31.9378	3.11779
Eif4e3	1.1307e-20	9.63747e-21	78.1923	3.11575
Plcd1	2.64188e-08	3.18261e-08	56.4002	3.11033
Src	1.57521e-05	1.57521e-05	69.4247	3.1066
RP23-90D6.1	1.437e-16	1.1123e-16	65.4086	3.10114
Fermt2	4.57369e-05	5.32182e-05	13.5498	3.08512
Tns2	2.42605e-05	3.34486e-05	18.4855	3.0841
Klrc3	2.57661e-09	1.58588e-09	29.0579	3.08343
Egr1	2.80498e-10	5.32647e-10	4624.57	3.08332
Ptpn3	1.93424e-20	1.49343e-20	85.7948	3.08312
Abr	2.1431e-51	2.02736e-51	1122	3.07963
Rps6ka2	7.67793e-10	5.47691e-10	37.4168	3.07578
Ccl3	8.35924e-142	1.58736e-141	129614	3.07353
Pag1	6.09798e-45	4.27856e-45	656.956	3.07051
Qpct	4.85047e-09	4.13428e-09	86.387	3.07038
Tmem163	1.25839e-67	1.25839e-67	328.483	3.06505
Cd200r1	1.57747e-11	1.90034e-11	60.3282	3.0641
Il23a	4.71752e-07	4.71752e-07	34.212	3.05861
Tnfsf9	1.01835e-95	8.48083e-96	710.616	3.05456
Gpc1	2.60999e-38	1.83126e-38	617.034	3.05336
Selm	1.27657e-05	1.2001e-05	13.2486	3.05308
RP24-175N4.1	3.70592e-06	4.36406e-06	20.0808	3.04535
Gng2	1.5457e-51	1.28726e-51	299.59	3.04173
Metrnl	1.94241e-37	1.56652e-37	250.418	3.04016
RP24-120O11.3	4.66555e-18	4.66555e-18	74.3523	3.03985
Adamts14	3.93285e-16	4.73782e-16	95.5883	3.03488
Glipr1	3.95099e-68	6.22797e-68	2547.16	3.01028
Cxcr6	1.59795e-88	3.02065e-88	16625.7	2.99385
RP23-442L7.4	6.77155e-06	5.22833e-06	26.891	2.98445
Ifng	3.11765e-88	5.94807e-88	104386	2.97667
RP23-410L16.5	1.153e-08	8.22468e-09	45.0342	2.95754
Mr1	3.92272e-06	2.48065e-06	23.403	2.95384
Fhl2	2.23566e-54	2.22207e-54	859.981	2.95018
Slc25a24	2.37079e-12	2.37079e-12	103.183	2.94593
Asb2	9.50132e-10	1.1446e-09	69.8348	2.9357
Tnf	2.14987e-27	4.01558e-27	12511.4	2.93308
Slc2a3	1.33096e-92	1.33096e-92	3549.14	2.91427
RP23-113I19.2	5.14327e-06	3.97113e-06	22.6028	2.90296
Capn2	5.11783e-29	3.59085e-29	559.694	2.90232
Tmem154	6.10504e-37	6.10504e-37	320.993	2.89587
S100a4	9.53269e-13	8.12515e-13	59.1308	2.88967
Atp2a3	1.01783e-139	1.93279e-139	2973.15	2.88863
Wwtr1	1.82461e-05	1.30155e-05	21.0029	2.88411
Tspan7	9.56183e-07	9.56183e-07	36.4672	2.87699
Rnasel	6.96198e-20	5.3998e-20	252.63	2.8569
Cd300ld	5.51773e-05	5.18721e-05	14.6217	2.85588
Jam2	7.38832e-08	5.27032e-08	29.6122	2.85029
Galm	3.55583e-29	3.55583e-29	221.38	2.84706
Nol4l	3.80905e-18	2.95435e-18	217.486	2.84363
Adcy4	0.000220677	0.000304253	11.3394	2.84285
Ccdc92	5.11408e-23	5.11408e-23	133.339	2.83557
Bcl6b	1.29145e-06	8.16687e-07	31.5294	2.83446
RP23-115A1.5	2.48911e-11	2.12158e-11	130.792	2.83351
L1cam	8.57151e-05	6.64817e-05	176.489	2.82907
Srxn1	1.39134e-81	2.65449e-81	9165.9	2.82574
Lasp1	6.67516e-21	1.06091e-20	1789.92	2.82574
Prkcg	1.82131e-05	1.40624e-05	22.1587	2.81098
Cep170b	9.25987e-43	8.75979e-43	845.597	2.80729
Lgals1	2.67117e-125	5.07236e-125	4035.44	2.80542
Tek	0.000228679	0.000266085	10.5054	2.79972
Adgrg3	2.33168e-16	1.9874e-16	90.3007	2.79907
Rhbdf2	1.78237e-124	3.40053e-124	3546.31	2.78879
Col4a2	0.000226438	0.000312197	17.4229	2.78771
Trib1	4.51118e-77	7.02634e-77	1420.25	2.78107
Rora	3.37154e-66	3.37154e-66	1105.34	2.7775
Atxn7l1	2.78353e-35	2.76661e-35	626.364	2.76551
Penk	1.56094e-45	1.47664e-45	936.247	2.764
Tnfsf10	1.48398e-41	1.47496e-41	565.285	2.76262
Tspan2	1.09027e-10	8.43915e-11	72.0274	2.76229
Ctsd	5.36387e-18	8.35444e-18	2126.13	2.75365
Nedd9	1.58546e-163	3.01068e-163	6541.57	2.74122
RP23-143A14.3	8.21604e-09	8.21604e-09	33.6856	2.73541
F2rl2	6.36133e-09	4.92393e-09	57.8205	2.72693
Ptrf	7.00165e-07	7.00165e-07	19.8489	2.69537
Ralgds	2.42384e-49	2.92588e-49	844.486	2.69537
Vdr	0.00010659	0.000124026	15.7701	2.69462
Crip2	8.31502e-25	6.70592e-25	215.624	2.68271
Rai14	1.75637e-16	1.3561e-16	103.122	2.67127
Gem	5.028e-50	7.97943e-50	1443.67	2.65454
Saa3	0.000334571	0.000393988	17.4146	2.64219
Raph1	2.3162e-15	1.89079e-15	179.986	2.64043
Dusp6	2.82131e-41	3.40568e-41	1257.95	2.63801
Phlda1	1.72004e-29	1.72004e-29	497.943	2.61912
Acsbg1	7.99757e-09	7.94896e-09	642.395	2.61497
Rab11fip4	7.74374e-36	7.69667e-36	767.017	2.61241
Zmiz1	2.63789e-46	2.63789e-46	1540.68	2.61214
Prex1	4.78676e-34	4.75767e-34	1348.17	2.60397
St14	5.65134e-07	4.70644e-07	230.434	2.60105
Ldlr	4.75112e-33	4.72224e-33	524.588	2.59545
Axl	3.01758e-05	2.51304e-05	387.161	2.58664
Pea15a	2.33662e-27	2.33662e-27	338.115	2.57719
Mocos	1.01142e-09	7.80916e-10	98.4964	2.57271
Tns1	1.31886e-05	1.02293e-05	144.706	2.57267
Pparg	6.80347e-11	4.18746e-11	46.8432	2.55424
Arrdc3	2.57471e-38	2.43566e-38	1241.86	2.54994
Cpt1a	9.22631e-24	7.68368e-24	360.226	2.54479
Phldb1	2.95391e-08	2.28072e-08	65.2761	2.52027
Kif3c	1.1059e-08	1.1059e-08	87.1338	2.5143
Stau2	4.85897e-06	3.07271e-06	27.2823	2.51234
Stk32c	2.55117e-06	1.61331e-06	36.4499	2.50867
Prdm1	4.56332e-44	4.56332e-44	1347.48	2.50368
Pdcd1	3.75736e-110	7.01809e-110	14002.7	2.47965
Gstt3	8.7497e-07	8.7497e-07	37.5072	2.47705
Styk1	0.000157994	0.000121987	107.861	2.47679
Anxa5	1.9725e-58	2.29236e-58	1309.58	2.46558
Chst12	6.01707e-13	4.66691e-13	232.239	2.46379
RP23-356K2.3	7.33855e-05	7.33855e-05	17.2813	2.45975
Emp3	1.51841e-64	1.26454e-64	677.574	2.4576
Susd3	1.33277e-10	1.03162e-10	76.6009	2.44592
Anxa4	4.63985e-15	4.63985e-15	351.519	2.44507
Fam110a	5.73954e-43	4.02707e-43	554.601	2.43776
Gas2l3	9.09712e-20	7.04154e-20	130.773	2.43065
Itsn1	9.14011e-15	7.79053e-15	116.992	2.42991
Cdkn1a	3.03683e-68	5.76673e-68	7707.07	2.42802
Synj2	1.01292e-23	7.85637e-24	242.621	2.41873
Tmem132e	0.000340056	0.000209301	23.0171	2.41466
Socs2	1.50371e-15	1.16393e-15	104.276	2.41416
RP23-337J18.2	4.72896e-05	5.56879e-05	13.6805	2.41356
Lzts1	0.000289703	0.00027235	10.5118	2.4045
Adgre5	4.9195e-103	9.29946e-103	2812.01	2.40091
Gdpd5	5.00464e-10	4.16787e-10	175.274	2.39879
Anxa11	2.52139e-37	2.50606e-37	483.392	2.37336
Slc9a3r2	0.000495102	0.000576089	10.3843	2.36928
Atp9a	2.61942e-22	2.03165e-22	294.92	2.36708
Ppfibp1	1.37557e-21	1.37557e-21	376.408	2.36384
Rarg	5.84567e-08	4.98253e-08	56.7222	2.3629
Spats2	4.92221e-16	4.92221e-16	145.941	2.36215
Sema4c	2.18149e-33	2.18149e-33	613.747	2.35005
RP24-112H7.1	3.28533e-18	2.54814e-18	242.707	2.34993
Runx2	1.2507e-99	1.97149e-99	2566.63	2.34752
F13a1	0.000124632	7.67099e-05	25.6622	2.34694
Cd40lg	6.07689e-19	4.26376e-19	375.028	2.34655
Idi2	1.36029e-13	1.15944e-13	103.219	2.34647
Ildr1	7.3421e-10	5.92128e-10	179.149	2.34642
Dok4	2.16246e-06	1.36749e-06	25.5317	2.34365
Card19	2.32946e-28	1.93998e-28	268.414	2.34195
Gzma	8.34364e-12	1.32413e-11	2379.11	2.32664
RP23-353P23.2	1.77266e-49	1.77266e-49	2472.56	2.32579
Laptm5	7.42845e-77	7.42845e-77	13764.7	2.32483
Ifitm3	1.36525e-38	1.36525e-38	382.333	2.32375
Neat1	4.31092e-41	4.07811e-41	1223.85	2.32144
Reep5	5.80864e-78	6.75056e-78	1176.81	2.32023
Areg	1.02054e-11	8.69856e-12	135.386	2.31303
Pcyt1a	1.16664e-31	1.11643e-31	611.631	2.31055
Glrx	1.18082e-26	1.17364e-26	635.991	2.31
Trim36	9.4212e-13	8.03012e-13	118.73	2.30952
Igf2bp2	0.000327314	0.000253355	60.195	2.30697
Tnfaip8l1	4.47241e-11	3.81204e-11	63.8987	2.3066
Rrad	4.86527e-29	4.60251e-29	1283.16	2.30458
Specc1	1.80386e-13	1.53752e-13	97.3817	2.3029
Nebl	1.89975e-05	1.35515e-05	42.7993	2.29927
Serpina3g	3.81057e-51	7.23602e-51	7196.38	2.29287
Kcnk7	7.0253e-05	4.44265e-05	24.8548	2.29192
Btg2	1.52972e-41	2.91849e-41	5341.73	2.2911
Tmc8	1.14053e-27	1.09144e-27	494.873	2.29025
Ccdc82	4.89652e-35	4.89652e-35	460.178	2.28924
Osgin1	1.01085e-10	8.61591e-11	77.1808	2.28905
Atp10a	8.46522e-62	1.61505e-61	4143.58	2.28656
Bspry	6.81518e-25	5.56345e-25	264.125	2.28253
Fam71b	2.76911e-17	3.33588e-17	131.483	2.27967
Mxd4	1.78237e-05	1.78237e-05	41.4893	2.27962
Xcr1	2.56578e-47	2.45535e-47	502.047	2.27598
Sult4a1	1.19746e-09	1.19746e-09	72.3108	2.26983
Cilp2	6.97404e-12	5.94429e-12	93.5861	2.26942
Fosb	2.9966e-13	2.49557e-13	162.044	2.26891
Kcnk5	1.23066e-45	1.48556e-45	1025.01	2.2688
Plxnd1	1.05883e-07	1.05883e-07	75.0343	2.26751
Itgb7	5.58269e-28	4.64927e-28	608.747	2.26742
Xylt1	6.03662e-14	4.92789e-14	169.793	2.26375
Epas1	8.88986e-10	7.25709e-10	175.375	2.25861
Olfm1	1.61287e-05	1.2453e-05	37.002	2.25369
Lag3	3.02512e-83	3.65171e-83	860.435	2.25204
Tcrg-C2	9.73776e-15	7.85333e-15	245.039	2.25167
Atp2b4	3.49771e-23	3.34718e-23	396.922	2.25163
Slc30a1	7.5512e-31	6.08991e-31	208.022	2.24904
Rbpj	3.75981e-151	7.17322e-151	6238.32	2.24902
Add1	1.99896e-54	1.99896e-54	1920.05	2.24432
Smox	3.64275e-36	5.67374e-36	2539.59	2.24241
Plod2	9.49176e-12	7.74843e-12	188.499	2.24134
Apobr	1.27952e-08	1.09059e-08	56.7565	2.24069
Sytl3	2.25387e-116	4.30008e-116	3281.82	2.23993
Jazf1	1.11416e-06	7.94764e-07	41.4261	2.23957
Clec4a3	1.40761e-05	8.90141e-06	26.0997	2.23484
Baiap2	2.95546e-26	2.46131e-26	394.207	2.23165
Prf1	2.34734e-31	4.38442e-31	7902.57	2.22687
Klrc1	3.45762e-42	6.56578e-42	9886.94	2.22366
Slc15a3	8.93985e-21	6.93386e-21	201.57	2.2229
Usp27x	2.44679e-05	1.5473e-05	23.1843	2.22245
Gzmb	8.71879e-12	1.65564e-11	86942	2.22162
Rbpsuh-rs3	3.57465e-07	2.26054e-07	32.0922	2.21988
Cd96	3.66135e-82	5.81911e-82	2628.88	2.21723
Enthd1	3.18997e-06	1.96339e-06	21.872	2.21598
Nfatc2	2.01803e-29	2.00576e-29	534.124	2.21205
Klrk1	3.23805e-16	6.04811e-16	2973	2.21062
Cmip	4.28717e-65	8.0077e-65	3590.75	2.20646
Litaf	3.87626e-64	7.32741e-64	4050.08	2.20279
Mical1	5.35262e-08	5.12225e-08	497.443	2.19292
Id2	1.09598e-53	1.09598e-53	8995.73	2.18497
Itgav	2.74463e-132	2.74463e-132	8779.68	2.17923
Jup	2.4424e-05	1.54452e-05	40.103	2.17888
AC163442.1	6.95589e-06	6.95589e-06	32.0819	2.17781
Trp53i13	2.0862e-14	2.0862e-14	214.793	2.17644
Pou2f2	1.82411e-38	1.82411e-38	1235.43	2.17565
Zdhhc2	2e-30	2.32432e-30	749.347	2.17484
Trgv2	2.54218e-12	1.96282e-12	84.3461	2.17441
Fam135a	0.000882102	0.000829262	13.357	2.17013
Ccng2	4.7482e-19	3.68277e-19	319.955	2.16685
Il18r1	3.6058e-35	3.41107e-35	991.185	2.16583
Cobll1	2.6273e-27	2.18802e-27	631.507	2.1654
B4galt4	3.40002e-06	2.62516e-06	37.231	2.16502
Slc52a3	8.7178e-16	8.7178e-16	245.243	2.15826
Hist1h1c	5.62879e-22	4.53952e-22	150.225	2.15819
Camk2b	0.000228866	0.000228866	22.0433	2.15705
RP24-264B23.2	2.97462e-07	1.88109e-07	42.937	2.15691
Kcnn4	1.97069e-42	1.97069e-42	3787.49	2.15547
Gpr68	1.20262e-67	2.27335e-67	6612.47	2.15486
Gcnt4	1.84662e-05	1.42578e-05	44.4989	2.15419
Zfp949	9.67749e-11	1.16582e-10	80.6844	2.15093
Tmtc3	1.18135e-07	1.18135e-07	51.4234	2.14668
Tigit	2.3616e-40	3.74786e-40	2399.32	2.14661
Clec4a1	6.88189e-06	5.31352e-06	43.8929	2.14319
Tlcd2	4.67457e-18	3.60924e-18	114.117	2.13806
Slc6a8	4.3946e-05	5.11344e-05	16.1527	2.13584
Prr13	1.77378e-93	3.35304e-93	3421.72	2.13238
Tob1	4.59819e-33	5.55061e-33	753.041	2.13234
Myo18a	2.95442e-08	2.95442e-08	164.521	2.12973
RP23-108F2.40	1.03409e-06	1.03409e-06	31.6517	2.12708
Dpysl3	0.000903857	0.0010517	13.2405	2.12575
Sgms1	3.42814e-38	2.76473e-38	329.099	2.12343
Mettl7a1	8.11675e-05	5.78993e-05	27.9972	2.11792
Rgs3	2.23789e-49	3.52759e-49	2295.43	2.11487
Tm4sf1	3.41051e-05	3.41051e-05	37.2221	2.11291
Cetn4	7.50367e-06	5.7936e-06	24.5038	2.11153
Nab2	6.26272e-24	9.87196e-24	1505.32	2.10504
Lysmd3	2.02885e-24	2.02885e-24	411.68	2.10229
Pkp3	5.23284e-25	4.27174e-25	270.341	2.10013
Tnfrsf1a	1.02634e-61	1.23892e-61	772.64	2.09739
Syne1	1.06096e-06	6.5301e-07	48.1165	2.09734
Gse1	7.58253e-27	6.31475e-27	276.682	2.08966
Slc43a3	1.9434e-20	1.50427e-20	128.145	2.08477
Peg13	1.95035e-21	1.86641e-21	420.588	2.08158
Csrp2	3.04761e-08	1.87577e-08	35.3996	2.07738
Pqlc3	3.3774e-22	2.61955e-22	197.662	2.07727
Man2a1	1.80239e-33	1.80239e-33	643.949	2.0748
Mdfic	8.02649e-42	1.27568e-41	2785.05	2.07331
Calca	2.47374e-06	2.47374e-06	61.791	2.07198
Epcam	6.34983e-38	4.45527e-38	612.025	2.07175
Alpk2	1.17158e-08	1.17158e-08	82.9382	2.06973
Klrc2	1.20016e-30	9.30858e-31	322.969	2.06632
RP23-37L2.3	0.000242369	0.000242369	17.614	2.05961
Creb3l2	1.43508e-19	1.43508e-19	290.116	2.0585
Smpd1	7.83138e-08	9.43429e-08	71.4553	2.05788
Ptk2b	3.47912e-61	6.6377e-61	5586.2	2.05465
AC107822.4	0.000607954	0.000838204	10.1693	2.04958
Trp53i11	3.49321e-45	3.49321e-45	753.269	2.04276
Abcb10	2.55724e-13	1.97445e-13	130.659	2.04136
Firre	6.69644e-06	8.06704e-06	64.5815	2.0409
Emilin2	0.000100902	0.000121554	52.5826	2.02954
Plekhb2	4.36038e-55	6.87329e-55	2052.65	2.02383
Il13ra1	2.20428e-06	2.20428e-06	55.9727	2.02297
Pcbp4	2.98628e-07	2.30571e-07	40.1327	2.01185
Cyth4	2.54017e-42	4.03719e-42	2637.99	2.01027
Optn	1.62392e-14	1.9563e-14	107.824	2.00329
Abcb9	6.18871e-35	5.15397e-35	476.269	2.00301
Hip1r	8.47896e-33	1.02352e-32	1066.99	2.00022
Mir22hg	1.55215e-51	1.48535e-51	598.515	1.99984
Cyfip1	8.32762e-28	6.93526e-28	503.929	1.99363
Prkd2	7.42496e-23	6.18352e-23	449.147	1.98696
Dusp8	0.000130045	0.000100408	21.861	1.98579
Ptpro	0.000192387	0.000148542	39.2838	1.98364
Chaf1b	9.7901e-17	8.15321e-17	465.584	1.97755
Tnfrsf4	8.1804e-18	8.13067e-18	1185.22	1.97721
Rgcc	1.24883e-40	2.3607e-40	3033.52	1.97403
RP23-300J20.3	3.70936e-10	2.87119e-10	76.417	1.97363
B4galt1	8.37535e-29	1.01101e-28	1347.09	1.97298
Tsc22d3	1.22907e-16	8.62357e-17	704.185	1.97021
Adgrl4	0.00124172	0.00124172	11.1417	1.96998
Ptpre	5.13394e-14	4.19101e-14	148.028	1.96783
Pbx4	6.59196e-05	4.70225e-05	32.7372	1.96759
Rgs2	7.51305e-39	1.17019e-38	2530.31	1.96757
Zeb2	3.64272e-59	6.91727e-59	3678.18	1.9665
Zbtb42	3.86795e-05	2.75913e-05	35.9266	1.966
RP24-229D18.2	7.51491e-06	5.36062e-06	23.8764	1.96478
Vcl	1.7184e-16	1.38586e-16	219.473	1.96471
Il21	5.66185e-07	4.3914e-07	144.312	1.95993
Tmem2	6.13615e-30	5.87206e-30	468.274	1.95868
Tesc	2.35515e-14	2.35515e-14	137.002	1.95725
Dip2b	4.79553e-62	7.46924e-62	1854.04	1.95522
Zfp367	3.56409e-12	2.90948e-12	151.739	1.95518
Bach1	4.79277e-35	4.79277e-35	433.195	1.95415
Arsg	0.000104268	0.000143758	20.2457	1.95358
Rtn4rl1	1.99083e-06	1.25896e-06	41.9853	1.95127
Slamf8	1.09349e-06	8.46403e-07	106.325	1.94364
Pmaip1	7.05358e-52	7.05358e-52	987.659	1.94354
Sowahc	4.39406e-11	5.29343e-11	80.0426	1.94153
S100a11	4.11377e-70	6.48455e-70	1540.98	1.93957
Zbtb32	1.0034e-40	1.90539e-40	6782.39	1.93622
Xcl1	1.83912e-61	3.49237e-61	80495.1	1.93441
Mapre2	1.47505e-49	1.47505e-49	1460.97	1.92901
Dusp4	6.84035e-106	1.08556e-105	1649.14	1.92863
Cdc14a	2.56346e-25	2.45314e-25	529.145	1.92772
Hspa1a	5.90442e-09	4.57954e-09	200.149	1.92767
Ndrg1	9.47129e-26	1.47519e-25	1643.94	1.92505
Prr5	6.40147e-07	4.56637e-07	40.5354	1.91688
Iqgap2	1.42746e-18	1.41878e-18	714.11	1.91179
Herc3	2.9488e-14	2.9488e-14	672.6	1.90939
Sec24d	4.19741e-25	4.19741e-25	313.199	1.90884
Phf1	1.3728e-22	9.63207e-23	424.736	1.90762
Impa2	1.06105e-07	8.19235e-08	51.5286	1.90675
Lxn	6.50943e-11	5.54829e-11	77.4543	1.90328
RP23-152I6.3	1.51081e-25	1.7558e-25	1108.86	1.90127
Hbegf	0.000187672	0.000144902	130.159	1.89747
Rasgef1b	1.09362e-15	1.32014e-15	1059.36	1.89244
Myo1d	3.00257e-21	2.32883e-21	216.235	1.89203
Prmt2	1.56845e-17	1.21651e-17	237.824	1.89011
Ids	2.31541e-13	1.92828e-13	316.834	1.88792
Mmp9	0.000329174	0.000309455	15.4663	1.88114
Kif13b	1.69631e-19	1.69631e-19	483.824	1.8804
Gpr83	0.00165715	0.00228476	17.9533	1.87849
Ampd3	0.000298142	0.000212674	23.6784	1.87823
Adap1	2.03759e-13	1.64328e-13	299.634	1.87688
Ptms	2.31865e-14	1.79473e-14	108.725	1.8756
Plin2	3.0173e-11	3.0173e-11	160.366	1.87127
Parp4	1.0923e-17	7.66399e-18	575.169	1.8689
Anxa2	3.97377e-34	7.42231e-34	6633.67	1.86829
Kctd11	8.54344e-06	5.40269e-06	45.6117	1.865
Hemk1	1.92248e-23	1.34888e-23	648.201	1.86416
RP23-249P4.1	3.48188e-20	3.33203e-20	356.524	1.86381
Furin	2.00939e-47	3.75318e-47	10896.5	1.85874
Abi2	7.40079e-26	7.40079e-26	378.398	1.85827
Pdcd1lg2	2.06124e-38	2.04871e-38	764.935	1.85704
Serpinb6a	3.2869e-19	3.2869e-19	330.897	1.85486
Pik3cg	3.55434e-29	2.96006e-29	403.095	1.85218
Ccl4	7.50004e-65	1.43091e-64	224522	1.85175
Angptl2	2.76355e-06	2.13374e-06	31.0975	1.84894
Cpd	7.1651e-17	5.02729e-17	674.838	1.84671
Tmcc3	2.64866e-06	2.64866e-06	48.6431	1.84668
Spint1	6.12639e-06	6.12639e-06	63.3931	1.84602
Nmrk1	9.52133e-38	6.6805e-38	680.397	1.84557
Lrch1	2.4311e-37	4.61648e-37	2850.3	1.84469
Twsg1	1.10789e-65	1.10789e-65	1739.79	1.84388
Fuca2	9.46633e-21	7.72768e-21	298.947	1.84208
Dhcr24	6.18747e-07	7.4539e-07	73.0931	1.84193
Plscr1	3.96589e-64	7.40759e-64	2990.19	1.84113
Nek6	3.39749e-52	5.35547e-52	2110.9	1.8404
RP24-386J17.2	0.00122017	0.00143687	11.329	1.83864
Tnfrsf1b	2.08958e-88	2.08958e-88	14508.1	1.83783
Fpr2	0.000151446	0.000116932	52.2177	1.83263
Cabyr	0.000651615	0.000758202	20.0637	1.8319
RP23-334A5.4	0.000530637	0.000409706	26.2802	1.82959
Neurl3	6.31963e-18	1.00292e-17	1418.91	1.82945
Serpina3f	2.90899e-14	2.90899e-14	826.044	1.8226
RP23-300J20.2	1.3244e-05	8.37526e-06	27.4085	1.82225
Dennd5a	5.99904e-63	5.99904e-63	2339.26	1.82151
Ltb	4.83903e-36	4.83903e-36	5678.55	1.82023
Elk3	1.4338e-21	1.4338e-21	730.735	1.82009
S100a10	9.52006e-56	1.51306e-55	2434.22	1.81947
Hlf	5.8595e-06	3.70543e-06	46.8736	1.81911
Pdlim7	2.68538e-07	2.0786e-07	62.01	1.81462
44083	5.60823e-23	8.84028e-23	1837.86	1.81339
Dapk2	0.000742165	0.00052941	21.347	1.81094
Ccl22	1.38949e-11	1.07771e-11	145.463	1.81029
Plpp2	1.48826e-10	1.15197e-10	85.9907	1.81021
Zyx	3.34381e-42	3.34381e-42	3668.98	1.80835
Myo10	4.46665e-20	4.22543e-20	955.088	1.80823
Gm2a	5.86422e-45	5.82858e-45	1000.78	1.80734
Arhgef9	6.77803e-06	4.28628e-06	41.2753	1.80707
Tmem38a	8.87042e-05	0.000104457	19.7969	1.80556
Ctnnal1	1.88103e-09	1.88103e-09	93.7589	1.80477
Megf9	5.29527e-06	4.09876e-06	57.4773	1.80132
Aplp2	1.91376e-37	1.91376e-37	4089.09	1.79951
Plk3	8.35258e-10	1.57891e-09	4912.05	1.79855
Qprt	7.34707e-06	5.68694e-06	78.3594	1.79646
Ptgfrn	0.000149578	9.45898e-05	38.6129	1.79546
Spsb1	3.1467e-14	2.62058e-14	322.13	1.79259
Mapk3	6.95707e-11	5.37157e-11	129.032	1.79186
Tnik	1.95364e-25	1.94176e-25	498.935	1.79145
Pld2	2.21709e-08	1.71612e-08	81.0708	1.7824
Cdon	6.68137e-09	5.38841e-09	225.043	1.78134
Il7r	4.6591e-07	5.41461e-07	1092.34	1.78044
Syne3	6.43255e-11	5.2511e-11	230.988	1.78001
Dopey2	8.31356e-35	1.57869e-34	3893.7	1.77996
RP23-175J8.3	5.12062e-13	4.26446e-13	246.592	1.77975
Cd99l2	1.15669e-06	1.39344e-06	55.9553	1.77917
Hist1h2bc	3.99101e-07	4.80787e-07	91.9957	1.77563
Crybg2	3.52189e-08	2.71926e-08	95.8863	1.77507
Smad7	2.06617e-25	3.279e-25	1834.67	1.77203
Atp6v0a1	2.53111e-08	2.53111e-08	80.1628	1.7707
Prnp	2.38318e-11	2.38318e-11	370.616	1.76951
Tax1bp3	9.28494e-07	7.18692e-07	57.0826	1.76885
Inpp4a	1.43849e-15	1.37658e-15	387.944	1.76702
Ppfibp2	0.000411126	0.000411126	34.7099	1.76293
Dennd2c	0.000251651	0.000179511	33.9876	1.7624
Stxbp1	1.2604e-05	1.2604e-05	53.4976	1.76189
Cyb561	0.000667427	0.000776602	19.6126	1.74977
Nptxr	0.00105201	0.00122409	11.5626	1.7475
Zbtb38	5.49443e-09	5.49443e-09	155.886	1.74716
RP24-159O13.1	4.78009e-08	3.69072e-08	78.0101	1.74667
Iffo2	4.22477e-06	4.22477e-06	42.1339	1.74596
Slc41a3	0.000788433	0.000498588	23.445	1.74085
Fam102a	6.06101e-48	9.61881e-48	2544.19	1.73833
Mfsd6	3.63572e-29	2.55095e-29	691.149	1.73416
Ncaph	1.93196e-27	1.92022e-27	456.713	1.73374
Adad1	0.000137895	0.000160451	17.8523	1.73352
AC122423.2	2.53394e-15	2.04358e-15	214.036	1.72697
Tube1	4.89595e-05	4.89595e-05	29.771	1.72575
43898	0.000254881	0.000181814	43.5316	1.72493
Flot2	2.2458e-18	1.83332e-18	221.813	1.72267
Ccr4	2.21584e-06	1.88866e-06	73.8478	1.72001
AC122462.1	1.36381e-08	1.053e-08	71.8366	1.71967
Dram1	3.40008e-07	2.63714e-07	194.061	1.71943
Slc22a4	0.00207534	0.00286133	12.7532	1.71844
Rab34	1.12136e-06	1.35087e-06	86.7486	1.71603
Ccno	0.000276062	0.000380614	19.6397	1.71582
Bhlhe40	2.16532e-53	4.04445e-53	11007.7	1.7136
Cystm1	3.95414e-10	3.22789e-10	251.142	1.71067
Aoah	0.00195391	0.00230091	13.4661	1.70676
Stk39	5.54087e-21	5.54087e-21	793.876	1.7062
Gtse1	8.16151e-15	8.1119e-15	378.264	1.70613
Antxr2	3.59457e-17	2.99356e-17	505.494	1.70447
Stk10	1.5983e-36	2.54023e-36	1796.29	1.70412
Ltbr	0.00167187	0.00194535	18.1478	1.70327
Plekho2	2.17931e-21	2.06162e-21	753.929	1.70177
Klf4	1.36521e-06	1.64464e-06	56.8244	1.7008
Wisp1	0.00183245	0.00215787	12.4769	1.6966
Mpzl3	6.05078e-29	6.05078e-29	2178.41	1.69598
RP23-285C18.2	8.74519e-22	1.05566e-21	1225.57	1.69271
Kif15	5.0555e-07	6.10264e-07	942.122	1.69188
Cd44	1.66521e-49	3.1478e-49	15039.2	1.69156
Il1r2	1.56773e-08	1.56773e-08	157.22	1.69131
Card11	1.44085e-17	1.44085e-17	279.494	1.68881
Ticam2	0.00183321	0.00213308	10.247	1.68823
Ckb	3.48192e-09	3.48192e-09	91.5709	1.68546
Ptgr1	1.16578e-06	9.70865e-07	159.74	1.68442
Lsp1	2.20355e-43	3.50219e-43	1400.49	1.68416
Mcub	2.5724e-07	3.09891e-07	76.8026	1.6816
Sec14l1	1.49248e-30	1.49248e-30	1352.21	1.68093
Rnf216	3.87681e-28	3.87681e-28	1027.13	1.67748
Txnip	8.85286e-30	1.06865e-29	752.989	1.67639
Igkv14-126	0.000797053	0.00109892	19.4423	1.67554
Adam19	5.90636e-32	9.31022e-32	1368.31	1.67436
Egr2	1.17381e-07	2.21889e-07	6526.28	1.67404
Zswim3	9.45292e-09	9.45292e-09	102.996	1.67277
Traf5	2.47822e-28	2.46316e-28	706.524	1.67114
Lcp2	1.21598e-10	1.21598e-10	10561.5	1.66966
Gas2	6.96385e-08	5.79951e-08	140.428	1.66936
Sqle	1.88776e-29	1.88776e-29	1408.54	1.66917
Grap2	1.4005e-32	1.4005e-32	513.74	1.66898
Ggta1	3.35582e-12	2.73947e-12	295.114	1.66838
Mfsd10	2.17202e-19	1.80886e-19	292.5	1.66639
Cd244	6.50813e-05	5.03756e-05	65.2061	1.66525
Ampd1	0.00146893	0.00202526	12.5841	1.66307
Cd86	5.83143e-32	5.79598e-32	987.295	1.66235
Rhob	5.92166e-13	5.92166e-13	275.175	1.66188
Carhsp1	4.71404e-22	3.30754e-22	595.127	1.66039
Slfn9	8.36086e-16	6.48479e-16	232.363	1.65687
Fndc3a	2.71813e-39	4.2846e-39	2696.15	1.65634
Trav3-3	5.59017e-28	5.5562e-28	411.442	1.65523
Csf3r	0.000141194	0.000109016	71.1862	1.65416
Paqr8	0.00125384	0.00125384	23.9912	1.65361
Fmnl1	3.7983e-24	3.7983e-24	4137.31	1.65179
RP23-101F14.3	2.78743e-15	2.78743e-15	494.592	1.65057
2310031A07Rik	7.98618e-05	7.98618e-05	36.5829	1.64999
Fcgr4	0.000511117	0.000314587	41.6887	1.6495
Rassf5	6.02934e-45	1.13974e-44	6009.18	1.64905
Serinc5	6.75619e-07	5.44875e-07	173.246	1.64546
RP24-487F9.4	3.53834e-07	2.73882e-07	76.7363	1.64197
Cebpd	3.57721e-05	2.55174e-05	39.8726	1.63943
Ankrd13d	0.00200998	0.00200998	11.8437	1.63872
Zfp382	6.74723e-12	6.74723e-12	168.086	1.636
Eml2	1.06819e-08	1.28682e-08	122.032	1.63534
Slc41a2	5.91834e-06	4.56956e-06	85.1128	1.63463
Serpinb1b	0.000243007	0.000188098	53.9051	1.63426
Tiam1	0.000171799	0.000206962	58.2405	1.63362
Sit1	2.72628e-05	2.72628e-05	51.52	1.63048
Arhgap18	1.37954e-05	1.37954e-05	140.955	1.6302
Gpd2	4.37367e-48	8.16925e-48	2949.83	1.63008
Tfeb	1.63168e-07	1.63168e-07	86.7283	1.62888
Coro2a	6.41406e-45	1.21247e-44	2918.72	1.62867
Ano6	7.47717e-32	7.43172e-32	1039.18	1.62638
Suox	1.64153e-11	1.64153e-11	323.219	1.62572
Cd3g	4.48381e-64	8.51444e-64	7277.6	1.62451
Runx2os1	6.10953e-11	4.71718e-11	95.6525	1.62362
Gnb4	9.30996e-10	7.75335e-10	149.72	1.62027
Slco3a1	3.57343e-27	4.31359e-27	832.828	1.61961
CAAA01147332.1	2.50728e-27	1.7592e-27	363.77	1.61958
Fam83g	5.97531e-19	4.19249e-19	611.842	1.61745
Fasl	3.75741e-21	5.92283e-21	2716.46	1.61742
Ech1	9.24904e-22	9.24904e-22	405.164	1.61711
Zmat1	3.13728e-07	2.42838e-07	92.9237	1.61609
Trav9-1	1.83096e-06	1.15786e-06	48.6992	1.61574
Snx9	3.22401e-39	3.20441e-39	1318.25	1.61446
Tm6sf1	4.62569e-11	3.5715e-11	125.879	1.61156
Igfbp7	0.0011849	0.0011849	21.9207	1.60856
Pygl	0.000680438	0.000485378	39.2694	1.60856
Fam46c	6.99621e-26	8.1307e-26	1134.9	1.60502
Irf5	2.12673e-19	1.49219e-19	488.322	1.60497
Nfil3	4.43547e-52	7.03908e-52	1755.52	1.60495
Amotl2	0.00199512	0.00234944	17.1789	1.60002
Zdhhc15	9.44806e-06	7.32803e-06	141.542	1.59995
Ell2	1.0216e-23	1.61036e-23	2267.56	1.59541
Ubash3b	4.07654e-49	7.77751e-49	3980.73	1.59429
Nr4a2	2.86543e-08	5.46685e-08	10085.1	1.59417
Gch1	1.95295e-35	3.64777e-35	4918.49	1.59381
Idh1	1.44804e-06	1.74442e-06	62.5903	1.5926
Frmd8	1.06626e-11	7.48126e-12	627.782	1.5923
Arhgef12	2.07681e-16	1.72957e-16	357.211	1.59206
Katnal1	0.00117042	0.00161369	19.0622	1.59184
Rcan3	1.15411e-05	1.15411e-05	111.271	1.59071
Fbxw17	1.40861e-08	1.20062e-08	134.176	1.58973
Mxi1	5.85986e-16	4.8801e-16	363.029	1.58842
Spata6	6.72736e-09	5.19421e-09	122.594	1.58362
Slc48a1	9.16053e-23	1.0646e-22	1207.39	1.58291
Il21r	9.60989e-49	1.83344e-48	11686.6	1.5829
Pld3	5.10781e-27	9.5405e-27	3223.79	1.58084
Plp2	4.87266e-28	4.66295e-28	574.194	1.57716
Pde7a	6.15117e-41	6.11378e-41	1326.29	1.57594
Msrb3	0.00126419	0.000901789	20.5835	1.5748
Arhgap21	1.79102e-10	1.79102e-10	319.458	1.57409
Atf3	8.59137e-23	8.59137e-23	3242.48	1.5737
Ccr3	0.000825222	0.000507915	25.6955	1.57227
Itgam	0.000223034	0.000141042	34.7065	1.57215
Gna15	9.82278e-18	9.82278e-18	264.938	1.57143
Gnaq	2.88221e-14	2.32446e-14	295.511	1.56852
Blvrb	1.04325e-08	1.03691e-08	366.75	1.56823
Fut7	0.00256943	0.00256943	15.1059	1.56805
Myo1f	3.27449e-05	3.25458e-05	364.86	1.56791
Clec5a	0.00255446	0.00197726	59.5873	1.56651
C2cd2	1.35048e-08	1.04745e-08	178.283	1.56497
Itga2b	0.00125206	0.00172625	18.6895	1.56465
Phactr2	6.18275e-26	4.33804e-26	635.688	1.5602
Ttc7	4.19078e-18	2.9404e-18	465.616	1.55953
Gstt1	0.000240667	0.000148128	32.2514	1.55942
Cdkn1c	2.12537e-05	1.30814e-05	33.7518	1.55939
Piwil2	1.24562e-05	9.61744e-06	60.673	1.55824
Ctnnbip1	0.000560309	0.000659816	18.357	1.55818
Evi2a	9.19133e-09	7.41265e-09	171.781	1.5578
Perp	1.39875e-15	1.39025e-15	1079.71	1.55607
Fam71f2	2.43591e-05	2.43591e-05	45.1187	1.55381
Tmbim1	1.07688e-19	1.07688e-19	706.206	1.55368
Chd2	2.97734e-16	2.97734e-16	1366.08	1.55239
Serpinh1	0.00286738	0.00333641	13.0588	1.55069
Gas2l1	3.10057e-08	2.39997e-08	73.1127	1.55012
Rbl2	6.30287e-21	6.26456e-21	526.232	1.54867
Acap2	1.45231e-20	1.20949e-20	566.998	1.54791
Ddit3	1.50069e-10	1.21028e-10	240.285	1.54776
Spic	0.00102714	0.000793058	22.2546	1.54718
Ethe1	2.6383e-06	2.6383e-06	53.874	1.54576
Plek	8.23054e-44	8.23054e-44	11207.5	1.54544
Agpat9	2.88939e-05	2.46276e-05	51.9603	1.54433
RP23-101P2.6	0.000295843	0.000187085	20.6866	1.54421
Plpp1	0.00049699	0.000578285	16.2974	1.54193
Lrfn4	2.54004e-06	1.96117e-06	54.781	1.54117
Lrrc8c	7.47657e-38	1.17854e-37	1877.98	1.54105
Cers6	3.48605e-19	5.54051e-19	1720.52	1.53923
Prkar2b	3.36835e-06	2.60071e-06	70.2845	1.53797
Kif3a	0.000110048	6.7733e-05	34.1165	1.53779
Atp2b1	1.9577e-40	1.9577e-40	3816.22	1.5372
Bst1	0.00027895	0.000176402	45.2133	1.53648
Fam63b	5.33326e-18	5.33326e-18	211.068	1.53583
Enpp1	1.47015e-10	1.22434e-10	192.9	1.53557
Tm7sf3	1.77773e-11	1.48049e-11	190.795	1.53467
Dip2a	0.000239723	0.000288788	99.6312	1.53456
Gzmc	2.06907e-05	2.40458e-05	1204.72	1.53344
Agl	9.81298e-07	7.59565e-07	71.9021	1.52885
Gna13	9.66639e-60	1.82727e-59	4345.06	1.52278
Ikzf4	8.37441e-06	8.37441e-06	129.236	1.52211
Susd6	6.82603e-31	1.07599e-30	2647.17	1.5215
Hnrnpll	7.84463e-63	1.46524e-62	3227.23	1.52127
Edn1	0.00305425	0.00287129	19.913	1.51965
Rell1	1.0406e-09	1.25358e-09	133.654	1.519
Vmn2r96	4.93787e-05	3.52234e-05	43.4109	1.5184
Klhl25	2.16075e-10	1.76389e-10	292.725	1.51825
Gabarapl1	3.92555e-32	4.56211e-32	1301.39	1.51801
RP23-71J17.1	1.44937e-19	1.44056e-19	1155.27	1.51714
Bzrap1	3.43341e-09	2.80281e-09	260.491	1.51404
RP23-115O3.2	0.000392132	0.000302766	22.1178	1.51395
Gfod1	2.32503e-18	3.66495e-18	1366.92	1.51249
RP23-137A24.6	2.00427e-07	1.66916e-07	195.15	1.5119
Frmd4a	0.000107926	0.000130016	128.012	1.51097
Itk	1.11027e-39	2.07379e-39	26234.1	1.50899
Fmnl3	3.89487e-12	3.87119e-12	1015.29	1.50862
Myo5b	0.000202868	0.000157028	50.783	1.50651
Tpm4	2.01556e-37	3.81006e-37	4379.76	1.50646
Bin1	3.54371e-40	3.35233e-40	1032.11	1.5031
Dgat1	3.83917e-34	3.83917e-34	1111.81	1.50182
Plxdc1	0.001566	0.00182216	14.4619	1.49961
Sdcbp2	4.07913e-08	3.28975e-08	194.281	1.49917
RP23-141N19.2	1.23977e-09	9.99852e-10	172.012	1.49801
Snai3	6.48606e-06	5.52836e-06	54.3229	1.49686
RP24-64D24.3	1.25196e-06	1.06711e-06	98.7763	1.49607
Srebf2	5.55115e-43	1.03686e-42	4180.25	1.49487
Lama5	0.00056288	0.000776059	18.9098	1.49214
S100a13	4.8675e-18	3.92555e-18	280.855	1.49121
Ccser2	1.43941e-21	1.67282e-21	845.316	1.49087
Lta	1.57625e-17	1.57625e-17	3607.77	1.49078
Ccr8	4.27842e-19	4.09429e-19	667.198	1.48758
Serinc3	6.75087e-33	1.27614e-32	6179.12	1.48681
Lfng	5.39075e-42	1.02848e-41	7251.09	1.48639
Pak6	0.000106678	8.23661e-05	45.7344	1.48601
Rasip1	0.00258009	0.00303829	14.0757	1.48528
Cast	2.5986e-35	2.5986e-35	2725.64	1.484
Eml1	8.79098e-05	6.80458e-05	92.8863	1.48382
Dnah8	0.000765888	0.000484331	32.4415	1.48362
Hspa4l	1.55536e-15	1.5459e-15	806.38	1.48203
Endod1	9.02457e-13	8.63617e-13	393.476	1.48178
Zfp703	8.18124e-17	6.81335e-17	344.206	1.48084
Stxbp3	8.93453e-30	8.88022e-30	678.764	1.48033
Cdc42ep3	1.67847e-14	1.67847e-14	226.552	1.47965
Ptpn13	3.37915e-10	3.37915e-10	326.714	1.47876
Fam214b	1.3373e-08	1.11371e-08	258.91	1.47759
Tmem9b	3.39359e-16	3.24753e-16	711.369	1.47715
Cish	2.2134e-63	4.22287e-63	15046.6	1.47669
Cxcl16	4.21644e-06	4.21644e-06	209.318	1.47641
Tgfbr2	7.23977e-22	1.14121e-21	2229.38	1.47562
Sqstm1	4.17949e-27	7.90061e-27	17606.2	1.47508
Bcl2l15	0.00286569	0.00333444	11.14	1.47446
Pttg1ip	1.43054e-33	1.43054e-33	1892.77	1.47176
Iqgap1	3.54948e-25	6.70968e-25	10056	1.47143
Ifi205	0.00112258	0.000916401	271.774	1.47003
Ndfip2	2.88449e-51	4.49272e-51	2550.66	1.46992
Cpeb4	9.41496e-11	7.84079e-11	195.237	1.46701
RP23-21F2.5	7.78338e-09	7.78338e-09	190.21	1.46698
Ctnnd2	0.00375736	0.00353229	20.1877	1.46685
Hid1	8.6001e-05	8.6001e-05	93.0806	1.46652
Ighg2b	0.00192494	0.00137312	42.6614	1.46429
Klf10	9.73177e-30	1.17475e-29	837.152	1.46328
Casp1	3.12525e-10	2.99075e-10	434.495	1.46264
Esam	0.00216191	0.00203241	17.0429	1.46146
Carns1	0.000206662	0.000159564	40.7244	1.46121
Pwwp2b	0.0012587	0.000774717	27.7562	1.46024
Card6	1.13624e-05	8.81279e-06	141.544	1.45817
Soat2	0.00334745	0.00334745	66.6161	1.45641
Vps37b	1.29149e-52	1.29149e-52	1674.26	1.45509
Slfn10-ps	1.11122e-21	1.11122e-21	856.907	1.45314
Ptpru	0.0022226	0.00261731	17.0326	1.45295
Selplg	4.8825e-48	4.8825e-48	3943.97	1.45134
Slc7a8	0.0033785	0.0033785	71.9284	1.44564
Jakmip1	1.95822e-09	1.51882e-09	181.753	1.44516
Batf3	0.000648597	0.000894239	20.2842	1.4441
Ucp2	9.76681e-51	1.82427e-50	7439.98	1.44403
Gtdc1	1.52865e-25	1.27307e-25	557.796	1.44395
Itpripl1	9.0738e-09	7.31787e-09	214.263	1.4376
Adssl1	3.84379e-06	3.09995e-06	154.564	1.43739
Sparc	0.00162546	0.00115949	32.687	1.43682
Gramd1a	2.45804e-37	2.45804e-37	2037.11	1.4357
Spi1	6.57157e-07	5.36459e-07	161.414	1.43533
S1pr4	1.75504e-09	1.4616e-09	145.859	1.43384
Stx11	1.20086e-25	2.28035e-25	3417.7	1.43288
Celf2	8.76876e-20	1.3916e-19	1804.15	1.43182
Cflar	1.73143e-35	3.27297e-35	4458.26	1.43147
Lrrc8d	1.9362e-22	3.05204e-22	1515.39	1.43039
Ccdc157	1.54567e-05	1.54567e-05	73.9336	1.42874
Fgr	6.39009e-08	6.39009e-08	207.301	1.42753
Spin4	6.52283e-11	5.43222e-11	314.092	1.42723
Pi4k2b	7.79301e-12	6.28493e-12	256.229	1.42697
Ccdc186	1.44174e-17	1.01158e-17	497.042	1.4248
Ska3	0.00074382	0.00074382	29.767	1.42389
Gm16907	7.80786e-17	7.7604e-17	500.41	1.4238
Dleu2	4.26617e-16	4.26617e-16	275.432	1.42135
Osbpl8	7.52092e-38	7.52092e-38	3961.54	1.4213
Adgrg5	0.00446358	0.00446358	92.4635	1.42021
Cd36	0.000465704	0.000465704	286.508	1.41662
Mfge8	1.61741e-06	1.32034e-06	193.134	1.41627
Trp53inp2	2.23323e-07	2.69032e-07	108.736	1.41352
Dusp2	8.93405e-27	1.66872e-26	15093.8	1.41278
Clec12a	0.000458237	0.000458237	36.3621	1.41234
Trim5	2.91329e-05	2.48313e-05	79.5261	1.41234
Kif18b	0.00340473	0.00400939	16.6467	1.41144
Abhd4	6.90352e-06	6.90352e-06	140.508	1.41011
Adcy7	2.85356e-10	2.30135e-10	349.917	1.40959
Cd6	1.17139e-27	1.17139e-27	14869	1.40947
Nsun6	1.60804e-06	1.24722e-06	173.129	1.40861
Qsox1	3.97993e-14	2.79246e-14	363.657	1.40717
Tmem63a	1.65635e-05	1.99537e-05	101.203	1.4069
Lclat1	2.19669e-15	1.54128e-15	396.922	1.40526
Rcor3	1.18262e-06	1.008e-06	109.693	1.40333
Rgs1	3.33398e-18	6.33099e-18	16056.4	1.4029
Trove2	5.89215e-06	5.02215e-06	70.9427	1.39675
Vgll4	3.59512e-20	5.667e-20	2756.23	1.39652
Ddah2	0.00213105	0.00247964	18.0394	1.39597
Cmtm7	6.19445e-34	7.4775e-34	1150.16	1.39533
Stard10	5.47323e-05	5.47323e-05	49.5704	1.39426
Crybg3	1.77385e-17	1.6975e-17	407.837	1.39402
Mapk14	1.05387e-19	9.96955e-20	790.678	1.39173
Dusp1	5.1424e-28	5.11114e-28	1085.75	1.39168
Car13	0.000606687	0.000517107	51.3074	1.39033
Mefv	7.91208e-05	7.91208e-05	110.533	1.38923
Gata3	1.63906e-13	1.6291e-13	1034.7	1.38807
Sdpr	0.00473961	0.0044557	20.26	1.38782
Fxyd5	1.37315e-74	1.37315e-74	5713.69	1.38512
Tmem43	1.39409e-16	1.3188e-16	1033.25	1.38441
Myh9	7.06133e-08	7.06133e-08	6932.34	1.38296
Eif2ak3	3.13396e-09	2.99908e-09	422.662	1.37971
Ptger4	3.2536e-20	5.17106e-20	2351.89	1.37852
Xdh	2.48727e-10	2.47216e-10	1079.79	1.37639
Fbxo30	8.88191e-20	8.40224e-20	1025.07	1.37639
Il2rb	1.09339e-38	2.07627e-38	27983.1	1.37413
Wwc2	1.14534e-06	1.37977e-06	96.6387	1.37387
Zfp768	0.0041346	0.00486887	11.3976	1.37367
RP23-382L1.7	0.00440027	0.00518172	11.1927	1.37366
Myo1c	4.15945e-16	4.15945e-16	1051.85	1.37259
Rassf3	3.09888e-19	3.09888e-19	481.887	1.37228
Adgre1	9.26558e-05	7.71639e-05	143.391	1.3722
Ctla2a	4.05196e-31	6.3111e-31	1595.19	1.37166
Cd226	3.20035e-26	3.20035e-26	1377.73	1.37075
Taf9b	5.26051e-07	5.26051e-07	311.718	1.36883
Cysltr1	0.00401162	0.00466782	16.4629	1.36776
Isg20	7.73459e-11	7.68758e-11	688.117	1.36633
Sla2	4.51511e-07	4.51511e-07	264.421	1.36538
Lmf2	1.51936e-26	1.76574e-26	1061.6	1.36423
Clec4e	0.000829113	0.00100085	1123.93	1.36164
Csf1r	0.00144355	0.00111964	314.843	1.36158
Ostf1	4.77353e-35	8.91612e-35	5433.34	1.36129
Dpysl2	2.75603e-12	1.93373e-12	427.157	1.35996
Fam188a	3.0859e-25	3.5863e-25	884.236	1.35959
Tjp2	1.19348e-05	1.19348e-05	200.793	1.35918
Arfgap3	1.76845e-12	1.42622e-12	220.873	1.35869
Mpzl2	5.40187e-08	4.17079e-08	130.16	1.35846
Nr4a1	6.1867e-08	1.18034e-07	36958.1	1.35789
Slc3a2	1.8297e-18	3.47447e-18	33525.9	1.35788
Zc3h12c	9.84069e-06	7.63256e-06	155.509	1.35627
Gdap2	6.93812e-16	6.89595e-16	448.251	1.35606
Slc2a8	3.49728e-05	3.49728e-05	45.8488	1.35514
Nt5e	4.46652e-08	4.46652e-08	532.963	1.35475
Kif23	6.05694e-07	6.05694e-07	166.402	1.35305
Cep120	3.10221e-21	3.08336e-21	1193.6	1.35282
Map7d1	2.01162e-15	2.33782e-15	729.546	1.351
Rcn3	4.35029e-05	5.24069e-05	53.1754	1.35058
Ankrd33b	0.000292975	0.000292975	40.6502	1.35012
Sc5d	1.40376e-16	1.34334e-16	575.007	1.35008
Atf6	4.85202e-37	7.64826e-37	2132.47	1.34915
Cd28	3.63346e-29	3.63346e-29	5917.12	1.34861
Lrrfip1	3.26267e-30	3.26267e-30	3686.46	1.347
Atxn1	5.58598e-17	5.28431e-17	1009.09	1.34572
Fyco1	2.12806e-23	2.47314e-23	1054.22	1.34534
Slc39a8	4.6893e-05	3.62971e-05	83.3054	1.34394
Arl15	6.90046e-12	5.35208e-12	213.74	1.3399
Ccl17	0.00381183	0.00443535	10.331	1.33757
Cdh5	0.00408612	0.00384135	13.1368	1.33661
Slc11a1	0.00173084	0.00144145	343.592	1.33546
Vat1	3.59389e-06	2.78182e-06	64.6678	1.33241
Gas8	0.0002894	0.000183011	47.956	1.33185
Suco	1.99303e-21	3.16294e-21	2145.28	1.33182
Ncoa2	2.99784e-14	2.99784e-14	1819.86	1.33081
Lrrtm2	0.00547077	0.00547077	11.4967	1.32995
Stard13	0.00147832	0.000934858	29.0101	1.32721
Cd38	5.93062e-05	4.59986e-05	196.488	1.3269
Rab3d	0.00457242	0.0028915	21.9897	1.32657
Ube2h	4.67835e-14	3.89613e-14	700.737	1.32605
Ggh	6.29748e-17	5.24455e-17	335.621	1.32447
Itga3	3.28132e-07	2.53351e-07	108.438	1.3226
Cltc	5.1108e-25	9.75074e-25	14023	1.3226
Slc12a7	2.26531e-08	2.16782e-08	463.698	1.32097
Spag9	9.9102e-20	1.89073e-19	3544.01	1.31977
hexb	8.56428e-09	6.90695e-09	142.927	1.31937
Ncald	0.000329973	0.000281251	124.236	1.31777
Secisbp2l	2.932e-19	4.56672e-19	1381.86	1.31777
RP23-104G16.1	1.88352e-11	1.46088e-11	169.113	1.31752
Irak2	6.3956e-15	6.3956e-15	683.944	1.3157
Apol7e	8.9197e-07	8.9197e-07	134.275	1.31417
Alcam	2.83727e-28	2.83727e-28	3310.67	1.31111
Il17a	0.00104444	0.000806411	99.6259	1.3098
RP23-158K20.2	0.000960755	0.000607561	31.493	1.30967
Cnih2	2.1469e-06	2.1469e-06	150.623	1.30959
Slc25a40	2.70206e-11	2.25028e-11	255.276	1.30852
Rapgef2	5.7834e-11	4.81643e-11	547.162	1.30555
H2-T22	6.70578e-17	6.70578e-17	2512.56	1.30518
Cacnb3	0.000139162	9.92683e-05	42.6937	1.30512
Smarca2	3.98367e-17	2.79508e-17	621.187	1.30385
2510009E07Rik	0.00585749	0.00807589	11.8948	1.3037
Cd8a	9.82774e-40	9.82774e-40	18212.1	1.30058
Tlr2	0.00149203	0.00149203	252.772	1.2996
Bicral	4.18118e-07	3.4821e-07	279.732	1.2989
Ccr2	0.000442078	0.000439391	399.693	1.29878
E2f2	0.00401639	0.00310106	23.6886	1.29744
Tbx21	9.26175e-31	1.75077e-30	8715.31	1.2956
Tmem51	0.00169	0.00169	29.3142	1.29515
Abtb1	5.09716e-06	4.11077e-06	191.682	1.29368
Agpat4	1.16818e-19	1.16818e-19	1802.99	1.29277
Mafa	0.00539919	0.00539919	11.1709	1.2895
Mgst3	0.00236679	0.00326316	16.2637	1.28883
Med13l	2.81201e-11	2.81201e-11	953.622	1.28799
Rel	4.59757e-19	8.73048e-19	8919.51	1.28404
Fabp4	0.00608401	0.0070792	10.1728	1.28383
Rasgrp1	7.7724e-22	1.46924e-21	3526.08	1.28317
Egr3	0.00168155	0.00117984	666.377	1.28033
Runx1	4.06835e-11	4.06835e-11	811.236	1.2761
Ankrd55	0.000211715	0.000211715	44.8054	1.27554
Micu1	1.78984e-10	1.25581e-10	498.487	1.27468
Eogt	1.26308e-05	1.26308e-05	108.298	1.27281
Ulk2	1.19749e-20	1.14595e-20	564.242	1.27231
Foxp4	6.57794e-22	6.57794e-22	1284.18	1.27169
Ace	0.00765529	0.00471174	38.3449	1.27126
Tbl1xr1	2.56926e-24	4.07741e-24	1592.37	1.27016
Ar	1.40303e-07	1.40303e-07	489.587	1.26986
Cdkn2c	0.000104695	8.08353e-05	48.4067	1.26959
Plxdc2	1.85681e-06	1.43365e-06	121.002	1.26876
Ankrd50	3.17215e-10	3.03563e-10	427.629	1.26767
Hmgcs1	2.89153e-13	2.87395e-13	930.969	1.26746
Asb1	8.45819e-06	1.01894e-05	128.093	1.26435
Wfdc17	0.000398872	0.00030937	141.163	1.26427
Map1lc3a	2.0118e-11	2.0118e-11	255.065	1.26392
Nfat5	2.62506e-14	4.1379e-14	2569.62	1.26377
Lipa	1.31e-08	9.19145e-09	700.386	1.2635
Tax1bp1	4.28061e-29	8.12859e-29	5440.31	1.26288
Cxcl9	0.000735532	0.000703876	542.277	1.2627
Ehd3	1.9895e-11	1.97741e-11	1009.81	1.26057
Magee1	1.15314e-07	9.41343e-08	167.126	1.26049
Errfi1	4.02087e-26	6.26266e-26	2687.21	1.26042
Ipcef1	6.67571e-15	1.26193e-14	3063.25	1.26017
Setx	1.21071e-18	1.40704e-18	1254.23	1.25991
Pnrc1	7.1684e-22	1.12996e-21	2777.43	1.2598
Eva1b	1.06789e-06	1.28647e-06	86.376	1.25951
Lims1	2.28468e-19	4.35887e-19	2993.37	1.25897
Narf	0.000135701	0.000115664	65.0582	1.25732
Cpeb2	0.000112117	9.55622e-05	86.901	1.25447
Ugdh	4.19701e-16	3.49527e-16	393.747	1.25333
Fth1	4.15493e-19	7.76068e-19	45630.2	1.25278
Clic1	3.24618e-49	6.16427e-49	4772.44	1.25201
Rb1	5.23022e-15	3.66971e-15	569.987	1.25138
Rnf166	8.33339e-21	8.28273e-21	691.872	1.24937
RP24-91G8.4	0.000184293	0.00014265	72.8522	1.24876
Cdo1	0.00330062	0.00330062	14.9418	1.24799
Sqrdl	0.0010805	0.000770757	46.1473	1.24783
Cdc42bpg	0.000451013	0.000348228	50.3205	1.24638
Arhgap31	8.01612e-08	7.67112e-08	573.566	1.24452
Ypel5	2.42947e-15	2.4147e-15	733.248	1.24451
Srpk2	1.63576e-11	1.14771e-11	358.443	1.24312
Jdp2	0.00179445	0.00113478	48.0199	1.24286
Hba-a1	0.00333482	0.00401738	56.6681	1.24134
AC130827.4	0.00675093	0.0093077	12.1598	1.24102
Foxj2	2.00461e-10	2.00461e-10	636.147	1.2391
Procr	0.00149406	0.00149406	391.988	1.23851
Akna	8.85051e-47	1.65312e-46	4327	1.23712
Prkcz	1.87107e-08	1.55823e-08	179.598	1.23618
Vamp8	1.88738e-16	1.57181e-16	453.158	1.23487
Tpbg	0.000237882	0.000146414	47.8311	1.23431
Kif11	6.50015e-05	5.03138e-05	136.189	1.23375
RP24-64D24.4	3.70946e-07	2.87127e-07	92.4832	1.23354
Kifc3	1.17546e-06	9.47988e-07	206.516	1.23275
Znfx1	2.94588e-15	4.6436e-15	1711.99	1.23274
Olfr99	0.00769312	0.00769312	14.1755	1.23228
Fbxo11	1.36276e-09	1.35447e-09	662.577	1.23064
Snx14	0.000158881	0.000132316	182.736	1.22872
Lin54	2.70751e-12	3.26832e-12	721.133	1.22682
Cst7	7.3065e-32	1.16125e-31	2132.85	1.22671
D030056L22Rik	4.42704e-20	7.02571e-20	1648.17	1.22665
Ednrb	0.00858083	0.00700481	232.753	1.22521
Irgq	3.91472e-10	3.91472e-10	191.122	1.22449
Fst	0.00628981	0.00485638	22.6203	1.22368
Pcdhgb6	0.00169848	0.00121158	22.3203	1.22329
Nfatc1	2.82833e-26	5.34647e-26	17313.3	1.22303
Mybl1	0.00554255	0.00554255	11.0226	1.22255
Ncapg2	0.00177314	0.00136904	104.672	1.22203
Kif4	0.00865347	0.00865347	19.5981	1.22198
Pik3r6	0.00799338	0.00941294	20.4577	1.22104
Hivep3	3.59445e-15	6.82562e-15	6238.35	1.21964
Rac2	1.69614e-37	1.69614e-37	3792	1.21808
B4galt5	2.37865e-39	2.37865e-39	4507.21	1.21694
Rab6b	1.03792e-08	1.03792e-08	173.298	1.21675
Arntl	1.58509e-12	1.51687e-12	694.822	1.21637
Soat1	3.66482e-15	4.2591e-15	1012.25	1.21579
Ldlrad4	7.49916e-05	5.79012e-05	102.674	1.21571
RP23-108F2.4	3.09409e-05	3.09409e-05	51.0161	1.21545
Ssbp3	1.62969e-14	1.54167e-14	732.112	1.21518
Chp1	2.65082e-13	3.08067e-13	951.875	1.21415
Rnf24	0.000378796	0.000378796	147.054	1.21402
Phlpp1	1.71396e-06	1.42739e-06	340.066	1.21156
Igf2r	4.86349e-13	7.57508e-13	1671.86	1.21106
Uhrf2	4.93866e-30	7.69216e-30	2577.84	1.20933
Mir146	7.26392e-05	6.19137e-05	55.1305	1.20822
RP23-336L12.3	7.82324e-05	5.58056e-05	45.2961	1.20779
Cnnm4	4.49827e-07	3.48892e-07	192.697	1.20775
Npnt	0.00208179	0.00250789	52.8435	1.20651
Pstpip2	0.000828855	0.000998502	66.4559	1.20648
Fam105a	6.61791e-14	5.51141e-14	523.33	1.2063
Bsdc1	2.4891e-11	2.47397e-11	563.482	1.20408
Mlkl	9.0868e-06	9.0868e-06	119.71	1.20393
Tor3a	4.6171e-08	3.23952e-08	684.99	1.20272
F2r	1.30835e-13	2.48447e-13	3936	1.20012
Msantd4	1.03548e-16	7.26528e-17	452.221	1.19917
Cd200r4	0.00142052	0.0010133	41.7536	1.19783
Stxbp5	6.2181e-19	5.88228e-19	919.181	1.19752
H2-Q2	0.00496916	0.00685112	15.6195	1.19706
H2-Q10	9.30217e-05	7.18222e-05	56.3771	1.19665
Slpi	0.00419464	0.00506347	896.533	1.1947
Ltbp4	0.00471981	0.00364417	35.5319	1.19168
Il10ra	4.29672e-15	6.82893e-15	1646.2	1.19166
Lrrk1	1.80599e-12	1.79501e-12	547.318	1.19047
Haus8	9.24064e-14	8.84295e-14	358.586	1.18938
Ubash3a	2.50994e-09	2.49469e-09	616.374	1.18846
Lgals7	0.00369333	0.00429747	17.0702	1.18845
RP23-395K11.2	0.000252441	0.000252441	47.0334	1.18826
RP24-403B15.1	0.00102362	0.000790336	30.4491	1.18741
Numbl	0.000347188	0.000268737	68.4665	1.18734
Hbp1	2.91342e-16	2.37832e-16	308.686	1.18685
Btbd10	3.1894e-19	2.2378e-19	567.081	1.186
Ccdc102a	1.86883e-06	2.25134e-06	77.954	1.18592
Il5	0.00830358	0.00830358	66.4998	1.18306
Jund	7.35582e-24	6.95856e-24	1291.16	1.18306
RP23-311G7.1	1.00954e-06	1.0034e-06	385.398	1.18273
Cfap43	2.05759e-10	2.05759e-10	680.994	1.18067
Plcl2	2.22538e-21	2.68632e-21	1289.34	1.18001
Cd82	1.06242e-28	2.01746e-28	18272.3	1.17974
RP24-245C15.2	0.00495871	0.00466167	16.9741	1.17804
Mpp2	0.00968241	0.0112662	17.0877	1.17721
Slc22a15	0.000290414	0.000207161	48.0275	1.17502
Arid1b	3.58375e-11	4.16489e-11	1187.44	1.17435
Trbv19	1.33589e-09	1.33589e-09	508.097	1.17261
Scpep1	3.42233e-15	3.40153e-15	568.126	1.17246
Nfia	0.00595686	0.00693125	11.7051	1.17211
Sh3bp1	0.00602777	0.00602777	12.9272	1.17069
Def6	7.34141e-13	8.53188e-13	858.927	1.17063
Smyd1	3.83459e-16	3.83459e-16	411.105	1.1694
RP23-70K10.1	0.00185348	0.0011408	26.3223	1.16881
Ccdc50	3.35009e-32	6.25738e-32	2844.15	1.16865
Zfp763	0.000982457	0.000758557	51.1188	1.16864
Esyt2	4.40146e-12	6.98511e-12	1455.05	1.16679
Cdk17	3.19004e-26	6.05767e-26	9190.35	1.16607
Fcgrt	0.00995392	0.0117217	10.0357	1.16568
Mbp	7.63684e-13	1.44361e-12	4216.88	1.16552
Reep3	2.34927e-19	3.70316e-19	1357.68	1.165
Fut4	0.00934507	0.0110047	12.5957	1.16472
Fry	0.00219938	0.00219938	52.472	1.16462
F10	0.00770766	0.00656959	118.312	1.1641
Sema4a	3.405e-08	2.83569e-08	633.913	1.1641
Arf6	6.35325e-44	1.18668e-43	9707.17	1.16319
AC134827.3	0.00244562	0.00174454	27.5502	1.1618
RP24-548A15.1	2.50706e-11	1.94451e-11	333.119	1.16135
Fam83d	0.000726384	0.000875058	66.7936	1.16124
Pde4c	0.00317301	0.00200655	23.8104	1.16102
Trafd1	4.53861e-10	4.51102e-10	1107.68	1.15942
Clec4n	0.00544509	0.005412	1103.78	1.1588
Cyp51	4.74834e-10	7.54671e-10	1788.77	1.1575
Klc1	2.46367e-24	2.46367e-24	1676.47	1.15739
H1f0	7.64768e-06	7.64768e-06	101.592	1.15702
Xbp1	1.20964e-25	1.20964e-25	5051.76	1.15673
Fcgr3	0.000947596	0.00114155	97.0305	1.15641
Kdm4d	0.00113632	0.000699391	46.6528	1.15521
Nagk	2.40974e-06	1.86523e-06	118.65	1.15514
Rgs9	0.0021459	0.00165686	59.3289	1.15481
Adora2a	1.47729e-14	2.34445e-14	2384.65	1.153
Itpr1	1.44506e-14	1.44506e-14	979.47	1.15216
Map7d3	0.000770578	0.000474282	36.8016	1.15178
Ly6i	2.81722e-05	2.81722e-05	88.0257	1.15155
RP23-128L22.2	0.00205436	0.00146544	22.3403	1.15133
Gnb5	0.00162009	0.00115566	43.5644	1.15059
Cyth2	2.60542e-16	1.82806e-16	624.474	1.14951
Fam126a	1.02671e-12	8.55047e-13	594.912	1.14922
Sema4d	3.15766e-24	5.99618e-24	5026.99	1.14916
Synj1	1.5664e-13	1.55688e-13	832.717	1.14783
Slain1	1.07921e-06	8.37051e-07	322.911	1.14759
Tln1	3.33138e-13	3.33138e-13	5282.16	1.14564
Zc2hc1a	0.00899047	0.00694156	22.1555	1.14561
Angptl4	0.00166125	0.00200127	62.4457	1.14506
Fech	6.94329e-07	5.78238e-07	170.336	1.14488
Sntb1	0.00036362	0.000302823	151.76	1.14473
Tmx4	3.62877e-09	3.02205e-09	306.259	1.14454
Ptprs	1.48267e-12	2.82874e-12	2911.95	1.14326
Il17ra	5.37467e-10	8.52958e-10	2075.65	1.14321
Rnf19b	3.09393e-05	5.9028e-05	3218.91	1.14319
Blcap	4.12292e-13	4.12292e-13	615.83	1.14299
Nrbp2	0.0108162	0.0149126	12.0742	1.14081
Rsph3b	0.0010218	0.000628908	26.7722	1.14075
Abca7	7.10574e-08	4.98564e-08	587.165	1.13952
Plekha2	1.94294e-10	3.06267e-10	2110.41	1.13883
Prss16	0.00352481	0.00251435	38.4	1.13677
Slc39a13	2.79648e-08	2.79648e-08	133.917	1.13612
Slc25a30	2.61837e-06	2.11167e-06	229.358	1.13415
Tacc1	2.01493e-16	3.17614e-16	1719.77	1.13261
Itgb2	2.40785e-25	4.49744e-25	10823.8	1.13192
H2-Q6	1.8596e-18	3.51526e-18	13003.3	1.13178
Ier2	1.74689e-26	1.74689e-26	5163.74	1.13102
Zbtb7b	0.0043899	0.00313145	24.067	1.13092
Npc1	8.3219e-11	6.45457e-11	350.742	1.13075
Mmp17	0.00178048	0.00178048	52.21	1.12963
Pald1	0.00269974	0.00170726	33.9913	1.12879
Sytl1	0.00400724	0.00285849	30.9195	1.12859
Trbv14	3.0879e-12	3.0879e-12	214.585	1.12847
H2-T10	1.33123e-08	1.07361e-08	346.047	1.12833
Zkscan5	1.90992e-05	1.47465e-05	136.83	1.12801
Zfp775	0.000268327	0.000228707	65.3117	1.12751
Kif1bp	4.5426e-08	4.5426e-08	243.37	1.12659
Nod1	1.90577e-05	1.47814e-05	175.716	1.12597
Matk	8.15961e-05	8.15961e-05	84.6694	1.12589
Sipa1l2	5.76741e-06	5.5192e-06	473.585	1.12582
Sirt2	6.19322e-26	5.85875e-26	1111.38	1.12555
Atg14	4.18279e-05	3.37335e-05	180.629	1.12548
Tgoln1	9.36204e-22	1.77779e-21	7867.37	1.12536
AC158971.1	1.18018e-06	9.51792e-07	208.532	1.12439
Mnda	6.05763e-08	4.88538e-08	289.042	1.12368
Fdft1	1.47637e-08	1.4674e-08	391.715	1.12335
Rhoq	4.36043e-07	4.36043e-07	431.88	1.12327
Insl6	0.000109041	9.29409e-05	85.3217	1.12262
Pik3cd	1.6948e-20	3.23345e-20	4065.49	1.12051
Ppp3ca	5.79883e-15	5.48566e-15	810.621	1.12037
Glmp	1.37867e-14	1.37029e-14	876.759	1.11948
Runx2os2	0.00220748	0.00157466	45.9127	1.11915
RP23-255P20.8	0.000816953	0.000630771	41.016	1.11855
Atp6ap2	2.28575e-27	3.62749e-27	2259.83	1.11812
Eea1	1.91617e-16	1.91617e-16	3568.13	1.11794
Mdm1	0.000397521	0.000306926	71.8198	1.11764
Itm2c	1.80191e-12	1.80191e-12	1053.26	1.11752
Nsd2	2.61847e-13	2.61847e-13	528.444	1.11638
Rassf4	0.000155796	0.000125647	186.383	1.1134
Lonrf3	0.00643843	0.00407153	28.0351	1.11315
Sdc4	2.49875e-05	1.75321e-05	479.339	1.11181
Stim2	2.02819e-20	3.22348e-20	2397.27	1.11112
Casp4	7.70067e-07	8.94939e-07	944.994	1.11091
Trim8	3.62042e-15	3.62042e-15	2909.71	1.11071
Abhd2	9.93799e-16	9.93799e-16	1131.64	1.11043
Nfkbiz	6.67009e-21	6.67009e-21	5609.08	1.1099
Slc16a11	0.00755688	0.00539056	34.6288	1.10984
Ppp1r3b	0.00301164	0.00233113	87.7553	1.10918
Dnah1	0.00938754	0.0088252	11.0236	1.10906
Rap2c	4.42612e-15	5.3429e-15	718.022	1.10854
Ebpl	9.57842e-07	9.57842e-07	151.781	1.10742
Dnase1l1	0.00150037	0.00115844	61.2687	1.10726
Mier3	1.05563e-21	9.98621e-22	875.814	1.10573
Rufy1	8.9683e-07	7.46881e-07	219.378	1.10397
Bbc3	9.39849e-05	7.57972e-05	158.862	1.10315
Zfp36	1.03436e-19	1.63047e-19	1853.53	1.10257
RP24-492O4.8	0.00514543	0.00605922	13.4479	1.10176
Slc9a9	1.63476e-07	1.63476e-07	215.602	1.10138
Mrc1	0.0119266	0.0119266	11.4915	1.10069
Mapkapk3	1.5862e-42	1.5862e-42	8560.6	1.09998
Ficd	3.01189e-07	2.4587e-07	144.553	1.09971
Ttc39b	1.4486e-26	2.7508e-26	4103.17	1.09932
Golim4	4.36637e-21	6.93962e-21	2161.08	1.0992
Klf8	0.00972728	0.00972728	30.9533	1.09847
Il1b	0.00651197	0.0103497	2407.99	1.09629
Klf6	1.27538e-13	1.27538e-13	5916.04	1.09603
Spn	1.82261e-12	1.72418e-12	929.619	1.09572
Mapkapk2	2.83074e-25	5.28732e-25	5265.37	1.09566
Samd9l	6.27488e-05	9.95822e-05	2125.09	1.09539
9930111J21Rik2	2.27447e-05	1.89418e-05	266.106	1.09491
Rara	2.75592e-14	4.38009e-14	1384.58	1.09469
Gca	9.3551e-05	0.000112699	92.1284	1.09456
Abca2	3.84765e-05	3.84765e-05	295.647	1.09423
Elmo2	1.02945e-10	1.19638e-10	1326.38	1.09403
Acot7	1.47215e-11	2.32055e-11	2716.43	1.09377
Rnd2	0.00297124	0.00211948	28.9753	1.09366
Polr2a	2.26393e-14	4.31929e-14	4391.92	1.09355
Ttll1	0.00885179	0.0102997	16.0002	1.09284
Btg1	9.26874e-21	1.76007e-20	21382.7	1.09261
Acadl	5.62926e-14	5.59504e-14	920.42	1.09146
Sik1	4.93814e-25	9.22359e-25	2977.69	1.09108
Pitpnc1	4.08512e-06	3.16847e-06	330.377	1.0906
Slc8b1	7.07649e-05	5.46378e-05	108.45	1.09028
Fyn	1.20339e-16	2.24771e-16	18372.6	1.09016
Abi3	0.00335275	0.00258867	20.849	1.08955
Zfp40	0.0080493	0.00509021	26.5427	1.08859
Cmpk2	4.79547e-05	3.9147e-05	346.538	1.08738
Flnb	8.05717e-12	7.62203e-12	1229.71	1.08738
Igkv6-25	0.0133986	0.012596	15.2874	1.08735
Ulbp1	0.00015525	0.000187026	125.784	1.08692
Pcdhgc3	0.00176717	0.00108767	30.7668	1.08631
Akap13	4.11224e-20	7.80887e-20	14181.3	1.08595
Ndrg4	0.00253257	0.00180656	40.2787	1.08591
Tpm1	1.13017e-13	1.36426e-13	808.654	1.08583
Sgol1	0.00833912	0.0114974	18.1441	1.08526
RP23-252O5.3	0.00773793	0.00551971	31.1746	1.08513
Plk2	8.36894e-08	6.96967e-08	400.591	1.08512
RP23-203J4.1	2.19541e-05	2.19541e-05	80.1631	1.08473
Gnai2	3.99767e-26	7.46695e-26	3898.52	1.08473
AC127556.5	0.00250139	0.00153958	28.486	1.08349
Extl3	5.03209e-13	7.99768e-13	2055.62	1.08257
RP23-50F19.4	0.00380923	0.00294111	36.6113	1.08198
Fam76a	1.88087e-17	1.79992e-17	570.696	1.08142
Tcta	0.000226302	0.000192887	85.8046	1.08082
Klhl18	1.17826e-07	9.50244e-08	284.814	1.08011
Rala	3.37048e-26	3.35e-26	811.409	1.07957
Rph3al	0.000727008	0.000459745	44.0644	1.07794
Rreb1	4.97681e-12	3.49191e-12	644.702	1.07789
Fos	8.49834e-07	9.87642e-07	819.086	1.07788
Stim1	8.24296e-09	6.86475e-09	680.071	1.07788
Ehbp1l1	6.72492e-09	6.68405e-09	646.752	1.07776
Olr1	0.00743872	0.00743872	196.693	1.07744
Faah	5.99816e-08	4.20852e-08	445.112	1.07696
Dnmt3a	2.7335e-23	5.16721e-23	4420.6	1.07678
Exoc6b	8.81385e-09	8.76028e-09	418.978	1.07628
Otud7b	3.40845e-09	3.26176e-09	615.978	1.07531
Nlrc3	0.000655735	0.000528839	183.511	1.07444
N4bp3	8.2795e-06	6.67727e-06	157.767	1.07391
Anxa1	0.00742004	0.00737494	442.185	1.07302
H2-D1	6.45751e-27	1.20615e-26	116200	1.07186
Fam111a	4.06876e-07	3.28138e-07	211.381	1.07133
Nckap1	1.736e-11	1.64225e-11	1059.83	1.07127
Itgal	1.58844e-16	3.03054e-16	6058.95	1.07098
Nqo2	0.00629821	0.00449271	24.5532	1.06977
Ifih1	0.00436929	0.00436929	1066.2	1.0695
Ssh1	0.00025524	0.000217553	104.726	1.0689
Cav1	0.00490444	0.00490444	85.8401	1.06868
Gm11110	4.78471e-06	3.70356e-06	126.013	1.06838
Erc1	2.4648e-06	1.91173e-06	206.27	1.06769
Scarb2	2.071e-09	2.05841e-09	413.734	1.06581
Ppp2r5b	0.000462198	0.000356864	100.407	1.06564
Spryd3	6.81776e-15	6.77632e-15	776.359	1.06563
Mx1	3.06953e-08	2.55631e-08	477.745	1.06368
Tubb4a	0.00541576	0.00541576	21.4189	1.06321
A3galt2	0.00789265	0.00609393	21.244	1.06244
Aim1	9.2933e-13	1.47485e-12	2377.07	1.05916
Smpdl3a	7.45264e-05	6.35223e-05	137.66	1.05894
Jun	1.24305e-12	1.97272e-12	1701.3	1.05878
Hp	0.0051313	0.00397184	52.7777	1.0581
Smtn	0.0102247	0.0118972	15.4728	1.0581
Tnfrsf9	4.30923e-24	8.22143e-24	57156.1	1.05621
Rab43	2.22878e-06	1.89969e-06	107.172	1.05596
RP23-122F3.1	1.53152e-26	2.92194e-26	3975.37	1.05539
Tbc1d2b	5.05661e-10	5.05661e-10	1052.85	1.05527
Ankrd9	0.000859119	0.000663328	80.8593	1.05473
RP23-181A8.7	7.74653e-06	6.32375e-06	303.15	1.05436
Ptpn9	2.12033e-11	2.02908e-11	436.683	1.05381
Elf4	7.66017e-09	7.24648e-09	1327.77	1.052
Gpr171	1.26772e-35	2.41865e-35	9059.4	1.05164
Zfp827	4.42464e-14	4.42464e-14	1017.52	1.05147
Actn4	4.3636e-29	8.32517e-29	9637.22	1.05139
RP23-108F2.8	1.73574e-06	2.09101e-06	135.919	1.04939
Tppp3	0.0124216	0.0146276	14.5087	1.04805
Entpd7	0.00109075	0.00131401	57.8703	1.04738
Lgals8	2.33783e-06	1.6403e-06	486.138	1.04692
Slc16a10	0.000190701	0.00014761	89.4728	1.04658
Nbr1	7.96044e-18	7.91205e-18	1324.06	1.0465
Casp7	0.0012201	0.000942042	84.4695	1.04532
Arid3a	8.91266e-07	7.1879e-07	158.901	1.04397
Syngr3	0.0157161	0.0157161	10.0402	1.04377
Dll1	0.0133832	0.0125816	16.722	1.04359
Amfr	2.26512e-28	4.23086e-28	6890.49	1.04326
Tecpr1	1.3853e-07	1.3853e-07	583.176	1.04202
Rhpn2	0.0115853	0.0115853	20.0445	1.04185
Tgfb1	3.12007e-28	5.82774e-28	5060.93	1.04182
RP23-343E20.2	5.66156e-12	3.97235e-12	388.407	1.04128
Eng	0.00256532	0.00162225	39.4312	1.0409
Anxa7	8.54868e-21	1.33149e-20	2054.28	1.04084
F11r	0.00983448	0.00621912	37.9727	1.04016
Lrp1	0.00544163	0.00544163	93.0588	1.03888
Ppp1r15a	3.83562e-10	7.16427e-10	2938.73	1.03866
AC107822.5	0.00163368	0.00163368	55.1386	1.03815
Prrc2b	9.4735e-12	9.4735e-12	1559.61	1.03726
RP23-379H6.3	0.00667772	0.00476343	23.9027	1.03681
Mex3c	1.96423e-09	2.28275e-09	1293.53	1.03549
RP23-381B19.3	6.04033e-06	4.87143e-06	229.225	1.03537
Tbc1d2	0.00102413	0.000872914	87.3165	1.03523
Tmem167b	6.72434e-14	6.36119e-14	787.863	1.03499
Ugt1a7c	0.014718	0.014718	17.7277	1.03496
RP24-276H6.1	4.90836e-07	4.90836e-07	367.774	1.0339
Xrn1	2.06242e-17	2.06242e-17	814.416	1.03282
Pik3ap1	1.34748e-07	1.33929e-07	884.205	1.03163
Sp3	3.10911e-26	4.90091e-26	2132.32	1.03123
Grina	2.18033e-12	1.81578e-12	467.75	1.03087
Slc43a2	1.08497e-06	9.03566e-07	165.611	1.03081
Cd8b1	1.20647e-20	2.29101e-20	17355.3	1.02887
RP24-315D19.3	0.00106667	0.000656521	43.5595	1.02732
Hps6	0.000130655	0.00010881	148.126	1.02663
Alms1	0.0121479	0.0121479	29.3438	1.02387
Prkch	1.61739e-19	3.08576e-19	11359.6	1.02359
Edem1	6.54335e-15	1.24838e-14	3198.19	1.02342
Cyr61	0.00953235	0.00812486	71.0752	1.02201
Tmc6	8.81059e-07	7.10558e-07	317.898	1.02166
Zc3h4	2.4548e-14	2.43988e-14	767.383	1.02145
Marveld2	0.000711354	0.000711354	135.48	1.0214
Thbs1	0.0122295	0.0122295	1188.24	1.02133
Klri2	0.000576974	0.000446602	81.0325	1.02125
Tulp4	7.27406e-09	7.27406e-09	240.264	1.02079
Sfn	6.43406e-08	4.51437e-08	687.42	1.02065
Bcl2l1	4.48496e-25	4.48496e-25	4692.27	1.01945
Junb	8.1578e-26	1.54209e-25	10640	1.01926
Tjp3	0.00306418	0.00306418	50.4586	1.01909
Tex15	8.96873e-05	7.46917e-05	142.371	1.0179
Arhgef2	1.46288e-18	2.30594e-18	2157.77	1.01775
Clic5	0.0169693	0.0169693	36.8504	1.01747
RP23-465M17.1	0.000176581	0.000329822	3788.69	1.01649
Crat	0.00490583	0.00418147	65.3089	1.01603
Trav4-2	0.0106393	0.010002	10.8058	1.0153
Insm1	0.0115556	0.0134458	18.064	1.01526
Dhcr7	0.00197474	0.0015247	61.5969	1.01521
Pon3	0.00931943	0.00589341	26.0051	1.01511
Crtam	1.29905e-32	1.29905e-32	17865.6	1.01484
Aim2	2.59567e-09	1.82121e-09	446.508	1.01437
Slc37a3	2.41959e-07	2.41959e-07	780.27	1.0133
Zfp689	2.69037e-06	2.19624e-06	247.344	1.01327
Plac8	1.90736e-08	3.639e-08	3119.37	1.01283
Mta3	7.48579e-08	7.44028e-08	507.38	1.01185
Rnd1	0.00964303	0.00687868	39.8032	1.0105
Gprin3	7.99757e-06	7.99757e-06	227.962	1.01021
Rbms1	5.25194e-10	8.34709e-10	1964.89	1.00953
Tnfaip3	2.31564e-25	4.41793e-25	33696.5	1.00928
Bbs9	0.00470591	0.00364257	59.1664	1.00882
Rab31	0.000864861	0.00104188	85.0532	1.0088
Mtss1	0.000104092	8.66879e-05	165.155	1.00834
Xylb	0.0151363	0.0178243	13.6077	1.00769
Saraf	4.23757e-12	8.04685e-12	3554.31	1.00742
Mtm1	0.00102555	0.00123545	87.0867	1.00722
Tmem159	0.0133805	0.00954472	27.3647	1.00683
Il2rg	7.67882e-28	1.46502e-27	10168.6	1.00505
Lrrfip2	8.30545e-11	5.8274e-11	444.115	1.00482
Slc16a6	1.48359e-15	2.31075e-15	1390.07	1.0046
Lancl2	0.00245859	0.00296181	95.1956	1.00364
Ccl24	0.0180601	0.0139792	76.0912	1.00362
Bcl2a1a	0.00230482	0.00230482	63.0607	1.0035
Hist1h4d	4.23568e-08	3.416e-08	268.865	1.00163
Pgrmc1	3.47951e-24	3.47951e-24	1616.15	1.00108
Slc4a8	0.0133547	0.0133547	26.6513	1.00099
Trim69	0.00950877	0.00950877	24.2824	1.00052
Rb1cc1	1.10868e-15	1.10195e-15	957.953	0.999958
RP24-414A22.1	0.00399551	0.00252668	31.104	0.998357
Axin2	0.00232381	0.00232381	41.4834	0.997682
Cd63	0.0146346	0.0146346	100.241	0.997446
Dennd1c	8.46132e-07	8.46132e-07	370.717	0.994924
Rdh10	2.50324e-05	2.50324e-05	117.623	0.994163
Nfkbid	1.18864e-10	2.25714e-10	14018.1	0.994035
Plekho1	0.00106282	0.000905892	58.405	0.993879
9930111J21Rik1	0.00047	0.00047	197.935	0.993819
Kidins220	7.57316e-09	1.20186e-08	1373.92	0.993416
Ctns	0.00212497	0.00164481	73.2571	0.993103
Mospd2	0.00213	0.0018155	85.2538	0.993101
Kctd10	2.95978e-11	2.94179e-11	1169.49	0.993009
Arl3	5.65302e-08	4.70785e-08	187.549	0.992797
Tnfaip2	0.0125571	0.0195582	1386.46	0.992341
Csrnp1	6.17005e-14	1.15246e-13	5523.46	0.991094
Spty2d1	2.13408e-20	4.07155e-20	2990.84	0.990245
Atp10d	2.09941e-10	2.00906e-10	414.62	0.989917
Ccrl2	2.2439e-05	1.80967e-05	242.121	0.9895
Gda	0.0108815	0.0131087	52.1373	0.988827
Cd14	0.0111188	0.0134219	1308.1	0.988457
Rnh1	4.78334e-16	7.59115e-16	1550.94	0.987702
Hes1	0.0191312	0.0179852	10.8971	0.986327
Atp8b2	5.46034e-12	5.42715e-12	1290.37	0.985829
Gpr35	0.00762579	0.00590268	60.018	0.984669
Ms4a6c	2.98466e-06	2.31494e-06	214.476	0.984474
Fcgr1	0.0122248	0.0122248	34.0111	0.984253
Als2	1.15565e-08	1.34304e-08	899.91	0.98381
Bub1b	0.00151828	0.00151828	96.3769	0.983386
Wdr44	2.0558e-06	1.44242e-06	362.684	0.983332
Ncs1	1.62766e-07	1.55761e-07	392.082	0.982424
RP24-476A4.4	0.0173074	0.0162707	10.7829	0.98172
Wfs1	0.0105754	0.00668766	39.0924	0.981014
Ctdsp2	0.00215231	0.00166936	180.086	0.979699
Flt3l	0.000866581	0.00104395	53.0996	0.979397
Il2ra	6.52472e-38	1.239e-37	25440.7	0.978411
Mturn	0.0111052	0.00792171	27.8396	0.977995
Map3k11	2.80115e-09	2.80115e-09	2285.28	0.977433
Ppp1r10	3.16362e-12	5.9091e-12	2928.43	0.976584
Farp1	6.00768e-11	5.74912e-11	490.026	0.976553
Sirt1	2.98061e-09	2.98061e-09	706.822	0.97626
Pim1	7.22623e-17	1.36599e-16	3619.36	0.976156
Gpr141	0.0175674	0.0149735	118.906	0.975789
Cdc25b	0.000141766	0.000141766	126.595	0.97527
Epha1	0.015036	0.0207305	17.7221	0.974677
Mis18a	1.13397e-08	1.07273e-08	774.764	0.973733
Pde4a	0.000531048	0.000531048	118.092	0.972631
Itpkb	1.23501e-14	1.23501e-14	1363.23	0.97223
Tspan14	1.53938e-13	1.789e-13	1030.73	0.972111
Ctsw	1.73942e-19	3.31859e-19	3261.01	0.971841
Zfp287	3.76112e-05	3.76112e-05	102.598	0.971552
Tspo	1.80306e-12	1.72546e-12	698.23	0.970367
RP24-470E5.4	0.000489395	0.000378812	86.7293	0.970349
Parp12	2.57895e-08	2.56328e-08	602.994	0.970251
Kdm7a	6.04111e-06	5.78111e-06	585.726	0.970159
Tollip	1.31928e-11	2.07959e-11	1867.83	0.969656
Rrm2	0.000841379	0.000841379	101.713	0.969623
Nedd4	1.8723e-07	1.86092e-07	437.831	0.969604
Tpst2	1.74322e-24	2.77057e-24	2402.31	0.968706
Acss2	0.00214611	0.00165702	90.1702	0.968648
Elmod3	0.000179887	0.000216706	106.322	0.966081
Sult2b1	6.68427e-08	8.06878e-08	1072.61	0.966006
Sun2	6.51262e-08	6.47304e-08	580.725	0.965661
Pik3ca	5.15509e-08	8.12599e-08	1844.35	0.965538
RP23-35H8.2	0.0061067	0.00520502	96.9351	0.965062
Dyrk1a	6.23838e-09	6.20046e-09	1053.09	0.963728
Tarm1	0.0201392	0.0201392	144.063	0.963361
Hmox1	8.72653e-05	0.00016496	5339.85	0.962728
RP24-140D11.4	0.0142514	0.0133977	13.1019	0.96269
Cd68	2.72094e-05	2.22119e-05	238.966	0.960229
RP23-174K7.2	0.0106813	0.0100414	18.1028	0.959203
Nfkbib	2.25438e-36	4.30105e-36	6847.93	0.958879
RP24-492O4.9	0.0176888	0.0205823	10.2663	0.958721
Abhd15	0.0195544	0.0269602	11.9235	0.957472
Mtmr14	3.6898e-07	2.5889e-07	566.478	0.956868
Mid1ip1	1.76321e-08	1.68732e-08	356.846	0.956796
Triobp	2.75606e-08	2.29525e-08	494.783	0.956597
Gtf2a1	9.76904e-11	9.76904e-11	1215.82	0.955863
Fgd6	5.99261e-06	4.64795e-06	182.084	0.954437
Chst11	4.90923e-06	4.90923e-06	611.626	0.953376
Caskin2	0.00549185	0.0066159	49.897	0.952948
RP23-377I11.1	0.00891279	0.00891279	19.783	0.952596
Arl8a	9.78032e-18	9.78032e-18	951.629	0.95168
Ppp1r18	4.03348e-12	4.03348e-12	1651.52	0.951478
Sccpdh	0.0164156	0.0164156	22.7027	0.951313
Psap	5.32945e-11	1.01679e-10	3099.99	0.950618
Arf2	3.27297e-06	2.72573e-06	501.361	0.949309
Plod1	0.000178959	0.000138803	179.105	0.949178
RP24-88J19.1	0.00371415	0.00264942	37.258	0.948995
Diaph1	2.70257e-18	2.70257e-18	1265.99	0.947767
Hivep2	1.55663e-13	2.94254e-13	2901.31	0.947667
Trpt1	0.0176544	0.0165968	11.1519	0.946493
Cep250	1.70735e-05	1.19794e-05	376.253	0.946482
Dhx57	8.33876e-06	6.94453e-06	237.598	0.946207
Nod2	0.0200485	0.0233279	17.8685	0.945374
B3gnt5	0.00238479	0.0018413	134.236	0.945049
Rsbn1	2.91333e-14	3.38576e-14	922.011	0.944359
Btbd8	0.00676144	0.00482314	46.8007	0.943315
Spred1	2.95005e-11	2.95005e-11	1166.38	0.943183
Paqr7	0.0119617	0.0119617	40.9774	0.94287
Rhof	4.87538e-25	9.25802e-25	7022.67	0.941974
Dctn1	6.40944e-11	1.01718e-10	1386.05	0.941546
Cers4	4.37359e-06	3.5703e-06	297.969	0.940071
RP23-387P23.6	0.00897326	0.00897326	24.0654	0.939898
Apaf1	7.36657e-09	7.36657e-09	778.262	0.938396
Nfkbia	2.01037e-25	2.01037e-25	12485.3	0.93827
Ern1	1.8307e-06	1.81957e-06	365.6	0.936988
Wbp1	0.00212307	0.00212307	34.4803	0.936898
Add3	3.10764e-12	4.84028e-12	1626.64	0.936477
Psd4	1.18282e-16	2.24608e-16	5747.12	0.936188
Rad21	3.19131e-11	3.85232e-11	1220.38	0.93572
Syt11	0.00178247	0.00137625	128.105	0.935321
Rfk	3.74785e-19	3.74785e-19	2282.09	0.934808
Peak1	8.19879e-14	9.52829e-14	945.024	0.934759
Anxa6	2.80312e-24	5.23574e-24	5256.22	0.934676
RP23-153G22.2	0.0114198	0.00881728	28.3543	0.933879
Slfn8	2.42859e-08	4.59083e-08	3134.83	0.933853
Rmdn2	0.00174263	0.00209931	62.4652	0.932388
Rabgef1	6.5451e-13	6.19162e-13	1162.2	0.931776
Pnpla8	3.74069e-11	3.5797e-11	688.678	0.931768
Prdm10	2.00162e-05	1.55248e-05	139.704	0.931696
Prkag1	7.51795e-08	5.83102e-08	233.775	0.931273
Rnf149	1.25993e-14	1.9624e-14	2138.73	0.931155
Sp2	7.49035e-08	7.49035e-08	1190.19	0.931062
Rab19	0.00173217	0.00147641	125.518	0.93059
Rab11fip1	1.40821e-11	2.23812e-11	1396.34	0.930293
Sntb2	6.76631e-05	5.45692e-05	190.808	0.930058
Mtfr2	0.0140493	0.0132077	17.8563	0.929791
Bcar1	0.0199105	0.0274512	14.4294	0.929779
Ap3m2	0.000499581	0.000499581	66.7084	0.929495
Pear1	6.68785e-06	6.68785e-06	366.054	0.928574
Aldh3a2	2.0315e-05	1.69184e-05	508.158	0.928458
Taf1	1.0207e-15	1.62224e-15	1360.25	0.928332
Nfkbil1	0.00020772	0.000250236	113.311	0.92694
Skil	3.95349e-27	7.47339e-27	3839.74	0.926469
Ubn1	4.22968e-10	6.66726e-10	1359.39	0.926384
Hspa1b	0.00229853	0.00161273	684.073	0.926337
Mad2l1bp	3.88059e-10	2.72276e-10	371.519	0.925529
Pdcd4	9.9557e-05	9.9557e-05	371.035	0.925442
Sertad1	5.02275e-10	5.83723e-10	1085.99	0.925356
Mgea5	1.16936e-12	2.23098e-12	2943.92	0.924817
Agfg2	0.00141042	0.00120217	62.3853	0.924474
Nrg1	0.0236877	0.0236877	49.5652	0.924212
Golph3	9.68386e-21	1.80878e-20	2798.85	0.923009
Tlr6	0.015146	0.00932216	27.3416	0.921616
Aak1	3.10737e-06	2.18024e-06	688.215	0.921334
Hadh	0.00235353	0.00235353	76.3044	0.920387
Tpx2	0.00287972	0.00287972	49.951	0.920121
Stx2	0.000133738	0.000111377	146.318	0.920067
Cd274	8.30095e-14	1.58371e-13	3362.34	0.920025
Traj26	0.0128137	0.0149097	19.1069	0.91911
Kcnh4	0.000646767	0.000551269	137.087	0.918462
Cdkn2d	0.000207781	0.00017304	145.188	0.918128
Lcmt1	1.42758e-06	1.16538e-06	156.526	0.917275
Foxo3	0.000677815	0.000524656	96.4251	0.91723
Mif4gd	5.27783e-16	5.27783e-16	1547.19	0.916941
Cited2	1.39766e-08	1.68716e-08	760.408	0.916406
RP23-118E21.9	0.00198543	0.00153296	57.2586	0.916389
Sptan1	1.72423e-09	1.72423e-09	3367.76	0.914691
Hvcn1	5.47196e-05	4.41304e-05	165.232	0.914631
RP24-315D19.4	0.00145451	0.000895236	45.0688	0.914385
Mitf	0.0203384	0.0157033	24.7231	0.913743
RP23-127B8.5	0.0150408	0.0141398	16.6498	0.913406
Spag5	0.00540848	0.00540848	36.0481	0.912924
Mtmr10	0.000330733	0.00026673	143.652	0.912583
Prcp	2.94993e-07	2.288e-07	238.569	0.912576
Yap1	0.0197536	0.0272348	14.602	0.912533
Hmgn5	3.13887e-07	2.43454e-07	241.336	0.911684
RP24-401L24.1	0.000618994	0.000618994	152.223	0.911569
Gorasp1	0.00361187	0.00257646	48.1173	0.910373
Zbtb2	1.34386e-07	1.28603e-07	536.81	0.909986
Tsc22d4	2.31408e-13	2.18911e-13	1222.08	0.909962
Fam160b1	4.80185e-13	5.79645e-13	772.946	0.909738
Arid3b	6.29529e-07	6.25703e-07	545.364	0.909629
Mgst1	0.00609347	0.00519375	92.7767	0.909363
Acaa2	3.19318e-06	2.6067e-06	325.543	0.908765
RP23-298B23.1	0.0252989	0.0348803	13.1239	0.907834
Mob3a	1.72427e-07	1.40758e-07	308.199	0.907816
RP24-66I20.1	0.0044297	0.0044297	30.2365	0.907779
Ahi1	1.54267e-07	1.53329e-07	757.877	0.90768
Spata13	2.48011e-08	3.86287e-08	1676.29	0.90756
Cyp4f18	0.00699405	0.00498908	42.215	0.907167
Usp25	1.31289e-15	2.49309e-15	4057.03	0.906788
Nrm	0.0033655	0.00260503	53.2441	0.90657
Jade2	8.29716e-08	8.29716e-08	390.274	0.906225
Bcl6	1.3185e-05	1.09805e-05	400.975	0.905952
RP23-214L4.1	1.89436e-10	3.61419e-10	2799.14	0.904845
Rrm2b	1.05626e-06	8.51856e-07	253.311	0.904734
Dennd4a	5.10834e-13	9.65644e-13	3170.02	0.904721
Pdlim2	0.000207796	0.000167584	180.108	0.904225
Cldnd2	0.0021986	0.0021986	43.4634	0.904181
Heg1	9.25607e-08	9.25607e-08	838.334	0.903656
Naip2	0.00460505	0.00356449	79.2431	0.902901
Pfkfb4	0.00300757	0.00300757	54.2459	0.902868
Crot	1.99919e-05	1.632e-05	324.046	0.902556
Lmo7	0.019208	0.0148305	31.1945	0.902459
Eps8	0.026155	0.0186572	41.7703	0.902042
Neu3	0.00541367	0.00417991	61.6338	0.901641
RP23-331E12.9	0.00316037	0.00316037	53.7128	0.901341
Parp16	0.025049	0.0291464	10.5674	0.900209
Ptbp3	8.21586e-19	1.56748e-18	3997.9	0.898536
RP23-74O4.1	1.2153e-11	1.14967e-11	1023.48	0.898375
Klc4	0.00348012	0.00419242	69.8951	0.898311
Lats2	0.000135346	0.000135346	281.15	0.898232
Etv5	0.00449144	0.00382826	72.3279	0.897401
Fbxw11	1.72546e-13	3.29194e-13	4201.83	0.897329
RP23-437A9.3	2.33032e-20	3.70366e-20	1761.16	0.896473
Ahr	1.24455e-07	1.24455e-07	1328.45	0.8959
Rab26	0.0208315	0.0208315	15.6506	0.895102
Capn1	3.3672e-08	3.3672e-08	618.319	0.894003
Tie1	0.020251	0.0124643	21.2503	0.892997
Washc5	6.93952e-07	8.37689e-07	787.914	0.892819
Strn	2.76491e-07	2.76491e-07	599.584	0.892279
Usp47	1.79307e-16	2.79278e-16	2623.94	0.892052
Calhm2	0.00240692	0.00186305	98.3809	0.89164
Zfp64	3.46753e-06	2.43294e-06	444.583	0.891611
Efnb2	0.0107927	0.00664281	42.9951	0.891605
Rap2a	2.50148e-05	2.50148e-05	505.446	0.891265
Nlrp3	0.0266507	0.0321055	100.243	0.891129
Dhx40	2.19802e-12	2.55445e-12	798.544	0.891093
Ptgs2	0.0258464	0.0300376	918.556	0.890985
Ndrg2	0.0134803	0.0134803	33.8283	0.890808
Arl6ip1	4.29734e-22	4.29734e-22	5853.87	0.890669
RP23-185B14.1	0.00421088	0.00325123	46.9888	0.890347
Osbpl5	0.000942248	0.000769188	142.494	0.890237
Rock1	3.12479e-25	5.96168e-25	3605.45	0.8897
Tmem221	0.0105603	0.007533	31.3611	0.889558
Msmo1	1.74126e-06	2.10193e-06	832.373	0.888832
Twf2	4.14096e-15	3.96274e-15	665.062	0.888728
Tshz1	7.79866e-05	6.3663e-05	197.351	0.88863
Klf13	1.48194e-13	1.48194e-13	1067.82	0.888561
Sos2	2.23813e-05	2.22452e-05	500.817	0.888522
Aebp2	1.36131e-18	2.54269e-18	4808.44	0.886875
Racgap1	2.23156e-06	2.23156e-06	292.185	0.886678
H2-Q7	3.03767e-21	5.76834e-21	21513.4	0.886614
Zc3h12a	2.08739e-16	2.42588e-16	1293.51	0.886391
Gltp	1.92866e-12	2.2414e-12	1027.57	0.885776
Treml4	0.0279514	0.0232779	169.227	0.884209
Hmgcr	6.11682e-11	1.14252e-10	4723.32	0.883504
Arhgap45	3.96084e-05	3.93676e-05	1135.31	0.883335
RP23-70K10.3	0.018506	0.0215331	13.3996	0.882832
RP23-454P8.1	0.00514938	0.00325636	47.7872	0.882089
Mtmr12	1.25138e-09	1.1838e-09	1281.32	0.88192
Maml1	1.52594e-05	1.18354e-05	204.823	0.880285
Pde4b	1.39869e-09	2.17851e-09	2420.51	0.879976
Cep162	0.00010552	8.16767e-05	126.583	0.879846
Gzmf	0.0277905	0.0261258	13.338	0.879515
Sorl1	1.6164e-05	1.13412e-05	705.264	0.879217
Ncf2	0.00091099	0.000734698	173.298	0.878714
Gadd45g	0.00236516	0.00236516	1697.76	0.876609
Xpr1	3.22547e-12	3.20586e-12	785.637	0.875231
Rnf157	4.04197e-07	6.29554e-07	2470.59	0.874918
Nsmaf	4.8745e-12	7.59223e-12	1604.7	0.874672
Ehd1	4.84425e-19	9.24218e-19	8392.6	0.874585
Nipal1	0.00391299	0.00302123	69.1643	0.87348
Med12l	0.00352376	0.00424499	74.5741	0.873069
Abca3	2.78885e-05	2.24916e-05	308.672	0.872953
Smap2	1.37249e-10	2.16346e-10	2021.96	0.872826
Acod1	0.0238913	0.0238913	1782.34	0.871994
H2-Q5	1.90587e-12	3.02461e-12	1718.88	0.871756
Sox7	0.0289636	0.0337014	12.559	0.8716
Cd151	0.0098895	0.00705449	29.4867	0.87121
Sgk1	1.78403e-07	2.15356e-07	988.045	0.870941
Parp14	6.08071e-07	1.13577e-06	3306.71	0.870745
Klc3	0.0286177	0.0269034	15.9726	0.870731
RP23-127E21.1	0.0258988	0.0243474	14.1178	0.870665
Tinagl1	0.0277145	0.0326364	14.0754	0.870154
Nptn	8.34843e-14	1.3003e-13	2096.41	0.8698
Arl13b	1.48387e-05	1.15091e-05	212.757	0.869489
Sh3bgrl	2.55076e-08	2.12428e-08	713.355	0.869383
Fcho2	6.66814e-08	5.55324e-08	592.821	0.869207
Tnrc6b	2.02746e-05	1.68848e-05	595.674	0.869096
Pbxip1	1.47146e-06	1.22543e-06	705.92	0.868969
Tnks	7.3301e-10	7.28555e-10	616.575	0.868741
Srgap3	4.50021e-07	4.30653e-07	376.416	0.868475
Cd52	2.76815e-18	4.39305e-18	1754.25	0.868172
Ccdc88c	1.18949e-10	1.8905e-10	1528.89	0.867388
Gcc1	2.32582e-08	2.70298e-08	732.224	0.867025
Nr4a3	2.95777e-08	5.6166e-08	9523.72	0.866764
Rdh12	0.0101003	0.00621661	28.0246	0.866762
Git2	1.77597e-13	2.76615e-13	1768.82	0.866669
Rpusd1	0.00122176	0.00122176	76.5688	0.866358
Mospd1	0.000659322	0.000794269	121.582	0.866253
Pdcd6ip	1.50718e-14	2.86204e-14	5571.46	0.865541
Tmem62	1.76996e-07	1.44488e-07	275.615	0.865265
Rtn3	5.47157e-14	8.68337e-14	2498.36	0.865165
Gbp3	3.55248e-07	3.55248e-07	1621.66	0.864416
Arg2	0.0157757	0.0121805	33.1994	0.864219
Zfp839	0.000102032	8.69664e-05	132.212	0.863582
Atp6v0d1	2.00411e-06	1.66902e-06	529.052	0.863381
Pmvk	0.000271974	0.000231816	102.648	0.862687
Poc1b	8.56014e-06	6.63935e-06	163.795	0.862602
Tgfbi	0.0303237	0.023413	127.683	0.862471
Slc33a1	4.88013e-05	4.88013e-05	260.069	0.862257
Hsd17b11	0.0151493	0.0142418	17.2928	0.862166
Zadh2	3.01887e-06	3.01887e-06	265.599	0.862046
Helz	1.16741e-07	1.35671e-07	766.783	0.861898
Tacc2	3.58302e-08	4.16404e-08	1242.54	0.861768
Fnip1	1.05397e-06	1.05397e-06	417.981	0.860003
Nipal3	0.0069436	0.00591835	53.9955	0.860001
Thap6	8.08139e-05	6.7302e-05	206.258	0.859376
Emilin1	0.0203097	0.0128434	38.7876	0.858417
Sh2d3c	0.0020263	0.00156844	107.587	0.857618
Kansl1	9.09069e-11	1.44269e-10	2420.14	0.857608
Clip2	0.0182807	0.0141145	21.5338	0.857367
Fcer1g	0.000470802	0.000470802	342.638	0.857343
Map2k3	9.12179e-15	1.73217e-14	23532.6	0.857036
Igkv19-93	0.0310314	0.0310314	72.4243	0.856563
Kif1b	7.0825e-07	8.54949e-07	722.551	0.856437
Trbv15	0.000167398	0.000167398	199.669	0.856033
Klhl28	5.14229e-06	4.28251e-06	486.818	0.855585
Hist1h2ac	0.0286703	0.03336	11.235	0.855288
RP23-142E18.4	0.0204937	0.0282553	16.4434	0.855243
Rxra	0.000660457	0.000660457	127.776	0.854582
Sorbs3	0.0230513	0.0164432	24.4103	0.854471
Vps54	7.35135e-14	1.3731e-13	4620.16	0.854382
Atxn7	2.1259e-12	1.77045e-12	691.915	0.854238
Fam63a	0.000520999	0.000520999	133.708	0.85364
Tmbim6	2.04257e-10	3.89696e-10	4083.14	0.852913
Lbh	4.6811e-05	3.61428e-05	118.904	0.85288
Yjefn3	0.00876864	0.00876864	28.0275	0.852305
Cpm	0.00130055	0.00100668	116.495	0.852086
Gpcpd1	6.3713e-09	9.92356e-09	1355.9	0.851071
Actg1	3.30055e-14	3.30055e-14	12043.2	0.851005
Dync1li1	4.85126e-18	7.71028e-18	1923.28	0.850895
Zfp14	0.00841891	0.00600547	36.9018	0.850881
Madd	8.06147e-07	1.27073e-06	2215.82	0.850562
Fscn1	0.0288254	0.0177417	37.2508	0.850188
Cdc45	0.00401761	0.00401761	70.9082	0.849901
Arhgap17	8.4267e-12	1.33929e-11	1429.03	0.84978
Bbs1	0.0314884	0.0296022	10.6517	0.849574
S100a5	0.00785849	0.00606755	32.2216	0.848752
Pla2g7	0.0239687	0.0278554	832.932	0.848167
Sh3bgrl3	8.2562e-16	8.2562e-16	1899.31	0.847988
Csgalnact2	4.39696e-07	3.6618e-07	320.597	0.847923
Cebpa	0.022072	0.0304313	17.6151	0.84684
Vps37c	1.30901e-09	1.30105e-09	557.197	0.846748
Zfp36l2	1.37834e-08	1.66384e-08	1295.99	0.846671
RP24-196H4.1	0.0263034	0.0309747	12.9463	0.846479
Ski	0.000134568	0.000134568	250.418	0.845881
Nab1	3.56648e-11	6.66157e-11	2887.45	0.84511
Cdan1	1.61285e-05	1.31662e-05	245.438	0.84506
Hilpda	1.14187e-11	1.7785e-11	2548.93	0.844495
Lrrc56	0.0316327	0.0316327	12.3901	0.84431
Edaradd	0.0233154	0.0147442	29.4183	0.844205
Arhgap26	1.2699e-05	1.26218e-05	624.05	0.843793
Traf1	1.70336e-14	1.70336e-14	15966.1	0.841996
Fam65a	0.00601055	0.00601055	72.5347	0.840695
Agbl3	0.0257618	0.0355186	15.2324	0.840433
Scrn3	0.0134208	0.0161678	54.2904	0.839204
Il4ra	2.41185e-22	4.57993e-22	9257.81	0.838603
Slc7a11	0.00724848	0.00874985	954.57	0.838182
Prkaca	0.000168364	0.000168364	214.036	0.838159
Nploc4	2.57772e-12	4.87274e-12	4654.95	0.838141
Kat6a	5.6745e-12	5.6745e-12	1433.72	0.838139
Tpgs2	3.93178e-07	3.04953e-07	325.289	0.838071
Prkx	1.22731e-08	1.16102e-08	1296.68	0.838001
AC113474.3	0.0136303	0.010524	26.3455	0.837188
Als2cl	0.00406692	0.00406692	102.041	0.836832
Dhrs7	7.63393e-06	6.23183e-06	268.455	0.836757
RP23-32A8.1	4.72871e-11	5.49551e-11	1152.53	0.836689
Zswim4	0.000709929	0.00111907	2618.37	0.836543
Ip6k1	2.18211e-10	3.39872e-10	1522.82	0.836192
Ctsb	8.442e-06	1.59582e-05	2931.48	0.835859
Unkl	1.68942e-06	1.37913e-06	253.953	0.835572
Syap1	8.94576e-10	8.94576e-10	1036.15	0.835209
Map3k4	0.000729628	0.000595619	141.599	0.834538
Tmem194b	0.00212584	0.00171445	147.491	0.834347
Insig2	1.34149e-07	1.28375e-07	443.407	0.834345
Ube2z	8.58295e-13	1.33683e-12	1912.03	0.833082
44085	4.67443e-16	4.67443e-16	15159.6	0.832396
Tgm2	0.0236356	0.0236356	267.496	0.832234
Tmem109	2.93313e-07	4.66173e-07	1434.45	0.831919
Ehd4	2.94874e-08	2.78949e-08	1049.11	0.83188
Caprin2	0.0164892	0.0164892	61.196	0.83147
Abcb1a	0.0159896	0.0112189	651.287	0.830495
Uhmk1	2.80733e-09	4.46179e-09	2611.54	0.830312
Ptger2	4.83601e-11	7.68605e-11	1511.54	0.82949
Msc	0.0337281	0.0465019	12.5024	0.82884
Tceal9	1.43498e-05	1.15729e-05	203.094	0.8287
Acbd5	5.08483e-09	5.08483e-09	700.65	0.828163
Ier5l	0.0334367	0.0334367	16.522	0.82792
Slc9a3r1	3.91714e-12	6.2165e-12	1788.12	0.827613
Picalm	4.369e-25	6.93359e-25	2616.95	0.827506
Wipf1	1.76997e-08	3.36105e-08	3074.79	0.827461
Tec	1.66749e-05	1.29333e-05	247.575	0.827409
Srgap2	1.88137e-07	1.86993e-07	369.026	0.827398
Adam9	1.19715e-06	1.19715e-06	507.115	0.825358
Hk3	0.0317708	0.0382735	101.74	0.823142
Flt1	0.0299289	0.0299289	43.6226	0.822851
Tmem41b	9.21357e-12	7.67308e-12	538.913	0.822303
Ccnd3	3.39609e-08	3.37544e-08	497.894	0.821602
Serinc1	1.40015e-22	1.40015e-22	5002.17	0.821507
Nfkb2	8.13171e-17	1.51886e-16	11821.5	0.821195
Frmd6	8.89917e-07	8.89917e-07	1389.26	0.821078
Ndfip1	8.60226e-16	1.6412e-15	19285.4	0.821074
Inpp5d	1.16786e-09	1.8409e-09	1449.61	0.821012
Aqp3	0.0216196	0.0136718	31.9766	0.820966
Tmem126b	0.000442219	0.000342295	134.334	0.820752
Adap2	0.0319989	0.0319989	18.6548	0.820718
Pias3	0.00272187	0.00272187	85.2957	0.820617
Actr1a	4.07583e-12	6.47786e-12	1988.12	0.819852
Foxd2	0.0194183	0.0233928	49.7688	0.819575
Acot9	1.66762e-14	2.64651e-14	1712.34	0.819319
Srebf1	1.363e-11	2.14851e-11	1631.46	0.818526
RP23-317N1.2	0.0183519	0.0141696	32.3663	0.817882
Ptpn22	1.07159e-08	2.02566e-08	19382.3	0.81784
Irf9	1.0407e-09	1.98553e-09	2982.96	0.817293
Zfp41	0.00755705	0.00910381	60.7623	0.815772
Napsa	0.000290193	0.000290193	115.153	0.815676
Tgif2	8.9111e-05	6.88028e-05	132.813	0.815535
Cox17	3.69349e-07	3.69349e-07	686.123	0.815043
Myo1e	1.08372e-05	9.02522e-06	550.06	0.814871
H2-Q4	3.06277e-08	3.06277e-08	752.443	0.814126
Tbc1d8b	0.00258549	0.00220373	111.688	0.813274
Setd1b	6.80148e-07	6.80148e-07	367.067	0.812525
Mprip	2.352e-06	1.65025e-06	701.492	0.812223
Ninl	0.037262	0.0350299	14.8673	0.811577
Gpr132	4.93962e-10	4.67286e-10	1189.01	0.810464
RP23-353J21.2	0.0285674	0.0268562	11.8315	0.810094
Ccr5	7.22071e-10	7.17682e-10	1167.97	0.810092
Tep1	5.46776e-06	5.23244e-06	387.233	0.809941
Lca5	0.0249728	0.0178139	20.7214	0.809669
Sdcbp	1.46383e-12	2.73418e-12	5289.04	0.809294
Kcng3	0.0304405	0.0304405	12.8386	0.808007
Nrd1	5.19864e-13	5.19864e-13	2617.57	0.807747
Tfec	0.0374521	0.0374521	17.7035	0.807589
Tubgcp2	4.58445e-06	4.58445e-06	544.671	0.807501
Sla	1.33886e-06	2.53089e-06	13360.2	0.807486
Pros1	0.000807974	0.000651617	146.867	0.805637
Snrk	1.32584e-07	1.31778e-07	670.309	0.805553
Tor1aip1	7.46646e-10	7.46646e-10	1867.83	0.805483
Stag2	5.30406e-12	8.26129e-12	2779.4	0.804982
Rab21	4.33251e-08	4.09853e-08	928.484	0.803888
H2-K2	0.00307273	0.00237246	132.033	0.803591
Wsb1	4.52469e-14	8.55316e-14	3615.79	0.803384
Mmp14	0.0150072	0.0115871	111.745	0.803271
Hcfc2	6.89201e-10	4.83568e-10	442.374	0.803264
Cdyl2	4.50389e-10	4.47651e-10	671.995	0.803108
Fbxl20	0.00254243	0.00306281	126.768	0.802403
RP24-496A9.6	0.00604639	0.00466843	37.5713	0.801216
Wrn	3.63502e-06	3.63502e-06	480.227	0.800995
Pcf11	6.24783e-17	9.9299e-17	1874	0.800994
Zfand3	1.37061e-06	1.14144e-06	481.267	0.800853
Abcb1b	2.21313e-08	3.51223e-08	2311.34	0.800626
Kdm6b	4.79633e-11	9.1079e-11	2796.69	0.800481
Slc4a2	4.72171e-08	5.69971e-08	913.272	0.800228
Plbd1	0.0179473	0.0138571	48.0191	0.799438
Athl1	0.000965162	0.000803789	170.485	0.798908
RP23-336I5.8	0.0328271	0.0381968	13.2833	0.798598
Cyp4b1	0.0355816	0.0274726	40.7387	0.798587
Flii	2.32643e-12	4.41774e-12	4183.89	0.797797
Trbv29	6.75879e-06	8.15873e-06	763.538	0.797725
Gpr65	2.21412e-18	4.20446e-18	4120.06	0.797612
Rgs14	0.00552942	0.00552942	89.3236	0.797418
Car4	0.0375566	0.0267903	31.4313	0.797331
Lmtk2	2.6742e-10	4.21536e-10	1369.62	0.796628
Helb	0.000108854	8.77892e-05	222.38	0.796333
Zfp870	0.0363684	0.0501422	16.4717	0.795967
Lst1	0.0278539	0.0278539	21.0333	0.795917
Unc5b	0.0394502	0.0459033	11.4785	0.794559
Zfp7	9.00618e-05	7.26333e-05	253.121	0.794379
Upk1a	0.0227243	0.0175455	24.0575	0.794334
Zfp317	1.46396e-10	1.46396e-10	859.926	0.794273
Map3k3	1.59338e-06	1.85176e-06	722.853	0.794255
Dmxl2	0.0376206	0.0518686	17.7378	0.794253
Atg13	1.06699e-08	1.06051e-08	662.349	0.794039
P2ry14	0.00546792	0.00546792	49.8569	0.793253
Igsf6	0.0181547	0.0140173	95.1321	0.792613
Ccsap	0.0022383	0.00172819	129.611	0.79249
RP23-129J8.3	0.023047	0.0145745	32.2677	0.792258
Rusc1	0.000284973	0.000242896	125.316	0.792103
Atp6v1d	1.03809e-10	1.03178e-10	847.815	0.792016
Brd2	7.00148e-17	1.30775e-16	10112.4	0.791962
Map3k1	4.3874e-09	4.36073e-09	890.466	0.791885
RP23-271B15.4	0.00268494	0.0022885	67.6753	0.791389
RP23-359F12.1	0.000208218	0.000161496	302.344	0.791368
Akr1e1	0.0221184	0.0139872	28.4034	0.791121
C2cd2l	0.00259722	0.00216297	189.025	0.790854
Mast1	0.0174754	0.0124658	42.964	0.790423
Fam129a	4.30813e-15	8.18085e-15	4052.31	0.789898
Fam234b	0.00012633	0.000105208	253.589	0.789622
Hgs	3.88045e-16	6.11677e-16	1368.91	0.789602
Dnase2a	0.00212232	0.00163865	102.288	0.789496
Slc17a5	0.000432766	0.000335659	158.311	0.789454
Gadd45b	3.53646e-17	6.6055e-17	9210.37	0.789122
Kctd9	1.39888e-05	1.39038e-05	428.603	0.788803
Dennd4c	0.000112914	9.40348e-05	539.571	0.788663
Ccni	6.57358e-11	1.04476e-10	2212.75	0.788225
Stard4	1.72377e-05	1.20946e-05	422.26	0.78779
Pde3b	1.40563e-11	2.23402e-11	2043.56	0.787763
Rtn4	8.97702e-11	8.97702e-11	754.601	0.785443
Idi1	1.5561e-06	1.5561e-06	435.585	0.784442
Acap1	7.8718e-09	9.14828e-09	848.431	0.784377
Asph	0.0152195	0.00962446	46.7563	0.784252
Clspn	0.0398721	0.0463941	16.2787	0.783673
Ep300	9.53756e-09	1.51361e-08	1909.91	0.783641
Wdsub1	0.00807239	0.00688047	61.3183	0.783502
Msn	1.04285e-13	1.94785e-13	28488.4	0.782355
H2-K1	2.31516e-15	4.39633e-15	103052	0.782288
Traf2	5.13786e-11	8.00243e-11	1886.26	0.782244
Itga6	0.000590127	0.00045771	281.953	0.781598
Gtf2b	1.83243e-24	2.91235e-24	2337.69	0.781297
Plekhm1	1.05434e-05	1.04794e-05	610.11	0.781082
Gnb2	2.71664e-09	2.71664e-09	1043.41	0.780896
Tmem140	0.00581137	0.00449824	69.9123	0.780805
Phf8	3.01938e-07	3.01938e-07	980.711	0.780542
Dtx3l	4.433e-05	7.04553e-05	2206.37	0.780374
Mtmr7	0.000752425	0.000752425	157.231	0.779885
Khnyn	3.05072e-05	3.68261e-05	777.437	0.779045
Acpp	0.040618	0.0478314	11.9092	0.778615
Rims3	0.0347465	0.0296161	55.2706	0.778445
Stat5b	3.88655e-18	7.2594e-18	5804.06	0.778359
Cwc25	6.08976e-09	6.05274e-09	911.233	0.778296
Gosr2	1.32927e-13	2.52419e-13	3739.71	0.777665
Il18rap	3.11826e-07	4.85682e-07	2311.38	0.776407
Map4	6.3465e-09	1.0004e-08	2240.03	0.77638
Rab1a	2.80413e-13	4.45671e-13	2722.8	0.775871
Clec4d	0.0420803	0.0420803	231.726	0.775792
Wdr90	0.00297271	0.002301	104.5	0.775512
Pxn	2.82204e-07	4.44839e-07	1764.04	0.775368
Pbx3	0.00807473	0.00623452	51.2473	0.775266
Tmf1	6.56118e-15	6.56118e-15	1293.67	0.77512
Gpatch2l	2.78984e-09	1.95745e-09	628.332	0.774893
Trav10n	0.0227186	0.0313228	19.5275	0.774706
Fam171b	0.0388202	0.0388202	25.1476	0.774322
Ier5	3.2092e-11	6.12273e-11	6251.72	0.774117
Stx7	0.000519379	0.000402836	307.585	0.77408
Mgat4b	0.00053154	0.00053154	162.421	0.773833
Mical2	0.0405911	0.0472308	16.8575	0.773752
Kcnk6	0.0100546	0.00857004	92.0711	0.773143
Itm2b	2.82696e-09	5.34389e-09	7183.69	0.773143
Sorbs1	0.0066047	0.00511231	114.336	0.772826
RP23-464E7.4	0.00681485	0.00681485	51.645	0.772606
Wdr5b	0.0145411	0.0112272	53.2929	0.772144
Ocrl	0.000810272	0.000810272	113.748	0.772003
Clcn6	1.19443e-05	1.19443e-05	369.244	0.771192
Ppp1r16b	3.38017e-08	6.41871e-08	7028.79	0.770934
Wbp2	3.26975e-12	5.15412e-12	1812.28	0.768999
Ap1s2	7.39356e-06	7.07536e-06	380.891	0.76754
Usf1	9.21581e-06	6.46614e-06	384.62	0.767225
Fam212b	0.0116447	0.0140282	118.436	0.766932
Zfp983	0.00812902	0.00812902	65.7934	0.763729
RP23-23G3.3	0.00871147	0.00871147	51.2384	0.763619
Wls	0.00314027	0.00242461	117.304	0.763528
AC130827.2	1.64074e-18	3.13032e-18	3508.53	0.763446
Pmepa1	0.0193822	0.0193822	433.699	0.763326
Cd3e	1.61039e-10	1.61039e-10	7348.12	0.762904
Slfn4	0.039677	0.0250909	37.5682	0.762881
Arrb2	5.24772e-06	4.37031e-06	402.599	0.76236
Ntng2	0.0195793	0.0139665	32.8719	0.761939
Sh3pxd2b	0.045618	0.0288479	20.9124	0.761741
Rbm47	0.0107297	0.00914544	112.989	0.761204
Cenpl	0.000133981	0.000108054	196.058	0.761123
Jarid2	1.60276e-06	2.49637e-06	2274.61	0.760957
Fam78a	0.00426219	0.00426219	110.175	0.760911
Tmco3	0.000198046	0.000153607	342.177	0.760457
Nusap1	0.0262766	0.0262766	29.1505	0.760298
Mfap1a	1.41603e-06	1.142e-06	273.254	0.760257
Sirpa	0.0415244	0.0345816	262.143	0.760049
Abtb2	6.26746e-10	6.26746e-10	3485.81	0.759813
Sgpl1	9.73701e-11	1.85769e-10	5176.24	0.759743
Prdm4	8.06504e-12	8.06504e-12	1932.47	0.759362
Cst3	2.60622e-10	2.46547e-10	1187.63	0.759216
RP23-118E21.11	0.0158289	0.0122215	43.5389	0.7587
Ppp3r1	1.10498e-08	1.33386e-08	1206.43	0.758537
Repin1	0.0015406	0.0015406	212.318	0.758493
Siae	0.013998	0.0108079	47.3174	0.758489
Tram1	2.55454e-13	4.77144e-13	3069.07	0.758036
Lpin2	1.75024e-07	1.7396e-07	765.663	0.758035
Actr8	1.94258e-07	1.93077e-07	529.869	0.757204
Spata2	1.22141e-10	1.4744e-10	1273.41	0.757175
Rnpep	1.18342e-12	1.42855e-12	799.933	0.756766
Bag3	0.000295698	0.000241388	192.256	0.756458
Lig1	0.00101043	0.000824851	185.754	0.756369
Erbb2ip	2.30153e-07	4.35065e-07	4827.31	0.756347
Ezr	7.69711e-17	7.69711e-17	11856.8	0.755978
Strip1	2.32881e-07	2.81117e-07	1170.48	0.755662
Gsn	0.00146748	0.00102963	403.003	0.755485
Pex11a	0.00681727	0.00527684	82.4333	0.755128
RP23-307A6.1	2.86535e-07	3.45885e-07	1222.88	0.755098
Dynlt3	2.99425e-05	2.32238e-05	269.016	0.75487
Slc37a2	0.000366691	0.000366691	190.616	0.754866
Slc25a16	0.000293442	0.000244379	171.632	0.754544
Slc28a2	0.0105522	0.00861413	144.871	0.754543
Rac1	5.95046e-22	1.11144e-21	5518.48	0.753114
Kif1c	0.00538366	0.00648557	57.0122	0.752955
Hspb1	0.0298846	0.0298846	37.0396	0.75241
Bnip2	4.022e-10	4.022e-10	1472.45	0.752358
Ksr1	2.6652e-06	2.21958e-06	664.753	0.751923
Fbxo6	7.85967e-08	7.52141e-08	434.436	0.751284
Pgap1	0.00228305	0.00228305	91.7824	0.75085
Klf11	3.92535e-05	3.20439e-05	157.73	0.750731
Far1	3.18446e-21	6.07552e-21	3982.93	0.750581
RP24-328P2.5	0.00057584	0.00057584	681.6	0.750577
Clasp1	7.01114e-07	6.96852e-07	1102.61	0.750389
Ifnar1	4.93571e-11	7.68757e-11	1369.79	0.750108
Tmem106a	0.00608474	0.00608474	108.883	0.750098
Bmf	0.0448643	0.0448643	17.297	0.747906
RP23-320I7.1	0.0461464	0.0461464	16.4519	0.747657
Bcor	2.57921e-08	4.9208e-08	2904.74	0.747547
Zfp945	0.00440424	0.00375394	93.0679	0.747436
Ift46	0.00122128	0.00147125	115.186	0.747038
Ostm1	3.29317e-07	2.31061e-07	701.599	0.746609
Zfand2a	2.95611e-11	3.43546e-11	911.731	0.746493
Phf11b	6.33252e-05	7.3594e-05	796.291	0.746489
Trip12	7.94335e-12	1.50155e-11	4439.18	0.746395
Med14	1.53139e-05	2.908e-05	2973.11	0.746219
Htatip2	4.16731e-06	4.14198e-06	389.29	0.745797
Galnt6	2.94115e-06	3.41809e-06	1084.27	0.745161
Lnpep	2.01594e-08	2.01594e-08	1189.33	0.744274
Klrd1	7.66219e-07	1.2078e-06	2013.56	0.743778
Ifngr1	9.80162e-16	9.80162e-16	8471.89	0.743557
Mdm2	8.44204e-11	8.44204e-11	2979.54	0.743236
Tbc1d19	0.04261	0.026226	24.3764	0.743131
S1pr2	3.98776e-07	3.32101e-07	456.185	0.742898
Rabgap1l	5.29076e-10	6.1487e-10	1046.25	0.742837
Pde4d	8.72854e-05	7.03942e-05	251.218	0.742719
Cab39	8.88846e-15	1.6958e-14	5153.03	0.742453
Atxn1l	3.21862e-05	2.62746e-05	165.965	0.741854
Mmp19	0.0493341	0.0351915	28.2291	0.741672
Tpm3	3.56339e-22	3.56339e-22	11807.1	0.741473
Ctxn1	0.0417242	0.0485492	11.3495	0.741448
Wdr47	0.000907437	0.000731832	230.11	0.741416
Prkar1a	2.74879e-14	5.21977e-14	15826.8	0.741182
Cdc42ep4	0.00809517	0.00626599	71.0908	0.74104
Gpx3	0.0417023	0.0297476	25.3821	0.740834
RP24-380G7.1	0.0325181	0.0325181	19.307	0.74066
Armc7	3.55939e-09	4.29665e-09	731.244	0.740486
Acox3	0.000549455	0.000443126	195.712	0.740356
Tle3	7.17864e-12	1.36317e-11	2812.76	0.738726
Mcemp1	0.0490447	0.0570671	14.1269	0.738099
Marveld1	0.0065289	0.00786521	103.607	0.737954
Tnip1	9.49673e-11	9.43901e-11	1027.65	0.736164
Lyn	0.00010781	0.00010781	311.821	0.736125
Ppp1r3f	0.0456063	0.0537057	10.0277	0.735761
Fam102b	6.34248e-06	5.28203e-06	348.775	0.735057
Atp7a	2.8045e-06	2.8045e-06	592.892	0.73496
Hspa2	0.000355708	0.000290376	171.116	0.734778
Pink1	0.0186159	0.0130616	428.584	0.734381
[truncated: 11,422 more rows]
